# Supplementary material
Source: PubMed Central journal article supplement (PMC4069399)
Supplement: ismej201430x3.pdf [file ismej201430x3.pdf]

Table S1 - mrkrPOG info2

**Table S1 - Taxon-specific marker genes**

| <b>POG</b> | <b>taxid</b> | <b>description</b>    | <b>rank</b> | <b>Quantitative</b> |
|------------|--------------|-----------------------|-------------|---------------------|
| POG3362    | 10474        | Fuselloviridae        | family      | Y                   |
| POG3538    | 10477        | Lipothrixviridae      | family      | Y                   |
| POG3515    | 10477        | Lipothrixviridae      | family      | Y                   |
| POG3531    | 10477        | Lipothrixviridae      | family      | Y                   |
| POG0337    | 10656        | Tectiviridae          | family      | Y                   |
| POG0573    | 10662        | Myoviridae            | family      | N                   |
| POG0351    | 10662        | Myoviridae            | family      | N                   |
| POG1165    | 10699        | Siphoviridae          | family      | N                   |
| POG0030    | 10744        | Podoviridae           | family      | N                   |
| POG2234    | 10841        | Microviridae          | family      | Y                   |
| POG3628    | 157897       | Rudiviridae           | family      | N                   |
| POG3630    | 157897       | Rudiviridae           | family      | N                   |
| POG3631    | 157897       | Rudiviridae           | family      | N                   |
| POG0337    | 10657        | Tectivirus            | genus       | Y                   |
| POG3354    | 10475        | Fusellovirus          | genus       | Y                   |
| POG3362    | 10475        | Fusellovirus          | genus       | Y                   |
| POG0463    | 10663        | "T4-like viruses"     | genus       | Y                   |
| POG0170    | 10842        | Microvirus            | genus       | Y                   |
| POG0173    | 10842        | Microvirus            | genus       | Y                   |
| POG0174    | 10842        | Microvirus            | genus       | Y                   |
| POG0176    | 10842        | Microvirus            | genus       | Y                   |
| POG0177    | 10842        | Microvirus            | genus       | Y                   |
| POG0178    | 10842        | Microvirus            | genus       | Y                   |
| POG0002    | 10861        | Inovirus              | genus       | N                   |
| POG0346    | 10875        | Plectrovirus          | genus       | Y                   |
| POG0347    | 10875        | Plectrovirus          | genus       | Y                   |
| POG3335    | 10875        | Plectrovirus          | genus       | N                   |
| POG0036    | 110456       | "T7-like viruses"     | genus       | Y                   |
| POG0027    | 110456       | "T7-like viruses"     | genus       | Y                   |
| POG0041    | 110456       | "T7-like viruses"     | genus       | Y                   |
| POG0571    | 140410       | "P2-like viruses"     | genus       | Y                   |
| POG4347    | 140410       | "P2-like viruses"     | genus       | N                   |
| POG1603    | 186764       | "L5-like viruses"     | genus       | Y                   |
| POG1605    | 186764       | "L5-like viruses"     | genus       | Y                   |
| POG1615    | 186764       | "L5-like viruses"     | genus       | Y                   |
| POG2077    | 186765       | "Lambda-like viruses" | genus       | N                   |
| POG2463    | 186765       | "Lambda-like viruses" | genus       | N                   |
| POG3564    | 186765       | "Lambda-like viruses" | genus       | N                   |
| POG3569    | 186765       | "Lambda-like viruses" | genus       | N                   |
| POG3571    | 186765       | "Lambda-like viruses" | genus       | N                   |
| POG2793    | 186777       | "Mu-like viruses"     | genus       | N                   |
| POG3328    | 186777       | "Mu-like viruses"     | genus       | N                   |
| POG0302    | 186794       | "P22-like viruses"    | genus       | Y                   |
| POG3488    | 186794       | "P22-like viruses"    | genus       | N                   |
| POG0875    | 186846       | "Phi29-like viruses"  | genus       | Y                   |
| POG0876    | 186846       | "Phi29-like viruses"  | genus       | Y                   |
| POG0878    | 186846       | "Phi29-like viruses"  | genus       | Y                   |
| POG0879    | 186846       | "Phi29-like viruses"  | genus       | Y                   |
| POG0885    | 186846       | "Phi29-like viruses"  | genus       | Y                   |

Table S1 - mrkrPOG info2

|         |         |                       |       |   |
|---------|---------|-----------------------|-------|---|
| POG2763 | 187217  | "T1-like viruses"     | genus | Y |
| POG2765 | 187217  | "T1-like viruses"     | genus | Y |
| POG2766 | 187217  | "T1-like viruses"     | genus | Y |
| POG2771 | 187217  | "T1-like viruses"     | genus | Y |
| POG2773 | 187217  | "T1-like viruses"     | genus | Y |
| POG2778 | 187217  | "T1-like viruses"     | genus | Y |
| POG2780 | 187217  | "T1-like viruses"     | genus | Y |
| POG2802 | 187217  | "T1-like viruses"     | genus | Y |
| POG3419 | 308912  | "PhiC31-like viruses" | genus | Y |
| POG3420 | 308912  | "PhiC31-like viruses" | genus | Y |
| POG3421 | 308912  | "PhiC31-like viruses" | genus | Y |
| POG3422 | 308912  | "PhiC31-like viruses" | genus | Y |
| POG3504 | 341940  | Betalipothrixvirus    | genus | Y |
| POG3508 | 341940  | Betalipothrixvirus    | genus | Y |
| POG3508 | 341940  | Betalipothrixvirus    | genus | Y |
| POG2377 | 371730  | "N4-like viruses"     | genus | Y |
| POG2380 | 371730  | "N4-like viruses"     | genus | Y |
| POG2383 | 371730  | "N4-like viruses"     | genus | Y |
| POG2384 | 371730  | "N4-like viruses"     | genus | Y |
| POG2387 | 371730  | "N4-like viruses"     | genus | Y |
| POG2389 | 371730  | "N4-like viruses"     | genus | Y |
| POG2390 | 371730  | "N4-like viruses"     | genus | Y |
| POG3794 | 477967  | "PhiKMV-like viruses" | genus | N |
| POG1055 | 542837  | "SP6-like viruses"    | genus | Y |
| POG1056 | 542837  | "SP6-like viruses"    | genus | Y |
| POG1057 | 542837  | "SP6-like viruses"    | genus | Y |
| POG1058 | 542837  | "SP6-like viruses"    | genus | Y |
| POG1061 | 542837  | "SP6-like viruses"    | genus | Y |
| POG1064 | 542837  | "SP6-like viruses"    | genus | Y |
| POG1065 | 542837  | "SP6-like viruses"    | genus | Y |
| POG1066 | 542837  | "SP6-like viruses"    | genus | Y |
| POG1191 | 680114  | "I3-like viruses"     | genus | Y |
| POG3252 | 680115  | "PhiKZ-like viruses"  | genus | Y |
| POG3254 | 680115  | "PhiKZ-like viruses"  | genus | Y |
| POG3245 | 680115  | "PhiKZ-like viruses"  | genus | Y |
| POG3732 | 680287  | "AHJD-like viruses"   | genus | Y |
| POG2211 | 1196844 | Hp1likevirus          | genus | Y |
| POG2212 | 1196844 | Hp1likevirus          | genus | Y |
| POG2213 | 1196844 | Hp1likevirus          | genus | Y |
| POG2216 | 1196844 | Hp1likevirus          | genus | Y |
| POG3660 | 1198138 | Bcep781likevirus      | genus | Y |
| POG3661 | 1198138 | Bcep781likevirus      | genus | Y |
| POG3664 | 1198138 | Bcep781likevirus      | genus | Y |
| POG1350 | 1198140 | FelixO1likevirus      | genus | Y |
| POG1375 | 1198140 | FelixO1likevirus      | genus | N |
| POG1425 | 1198140 | FelixO1likevirus      | genus | Y |
| POG1916 | 1198980 | PB1likevirus          | genus | Y |
| POG1919 | 1198980 | PB1likevirus          | genus | Y |
| POG1920 | 1198980 | PB1likevirus          | genus | Y |
| POG1921 | 1198980 | PB1likevirus          | genus | Y |
| POG4377 | 1198989 | PhiCD119likevirus     | genus | Y |

Table S1 - mrkrPOG info2

|         |         |                                       |             |   |
|---------|---------|---------------------------------------|-------------|---|
| POG4378 | 1198989 | PhiCD119likevirus                     | genus       | Y |
| POG4382 | 1198989 | PhiCD119likevirus                     | genus       | Y |
| POG4383 | 1198989 | PhiCD119likevirus                     | genus       | Y |
| POG0252 | 35237   | dsDNA viruses no RNA stage            | no rank     | N |
| POG4542 | 35325   | dsRNA nonenveloped viruses            | no rank     | Y |
| POG1877 | 102294  | unclassified Caudovirales             | no rank     | Y |
| POG1111 | 196894  | unclassified Siphoviridae             | no rank     | N |
| POG1151 | 196894  | unclassified Siphoviridae             | no rank     | N |
| POG1048 | 196895  | unclassified Podoviridae              | no rank     | N |
| POG1355 | 196896  | unclassified Myoviridae               | no rank     | N |
| POG0415 | 329380  | unclassified T4-like phages           | genus equiv | N |
| POG0490 | 329380  | unclassified T4-like phages           | genus equiv | N |
| POG3882 | 349054  | unclassified Fusellovirus             | genus equiv | Y |
| POG3884 | 349054  | unclassified Fusellovirus             | genus equiv | Y |
| POG2769 | 355245  | unclassified T1-like viruses          | genus equiv | N |
| POG2785 | 355245  | unclassified T1-like viruses          | genus equiv | N |
| POG4429 | 356623  | unclassified Inovirus                 | genus equiv | N |
| POG4430 | 356623  | unclassified Inovirus                 | genus equiv | N |
| POG0166 | 439488  | ssRNA viruses                         | no rank     | Y |
| POG0167 | 439488  | ssRNA viruses                         | no rank     | Y |
| POG1917 | 686598  | unassigned Myoviridae                 | no rank     | N |
| POG1924 | 686598  | unassigned Myoviridae                 | no rank     | N |
| POG0256 | 686602  | unassigned Podoviridae                | no rank     | N |
| POG3145 | 1113536 | CBA120-like viruses                   | no rank     | Y |
| POG3100 | 1113536 | CBA120-like viruses                   | no rank     | Y |
| POG3116 | 1113536 | CBA120-like viruses                   | no rank     | Y |
| POG1402 | 1132574 | unclassified Autographivirinae        | no rank     | Y |
| POG1406 | 1132574 | unclassified Autographivirinae        | no rank     | Y |
| POG0210 | 28883   | Caudovirales                          | order       | N |
| POG1116 | 28883   | Caudovirales                          | order       | N |
| POG0744 | 114416  | Lactococcus lactis bacteriophage ul36 | species     | N |
| POG0745 | 114416  | Lactococcus lactis bacteriophage ul36 | species     | N |
| POG0748 | 114416  | Lactococcus lactis bacteriophage ul36 | species     | N |
| POG0750 | 114416  | Lactococcus lactis bacteriophage ul36 | species     | N |
| POG0751 | 114416  | Lactococcus lactis bacteriophage ul36 | species     | N |
| POG0887 | 354259  | 936 group of lactococcal phages       | species     | Y |
| POG0893 | 354259  | 936 group of lactococcal phages       | species     | Y |
| POG0903 | 354259  | 936 group of lactococcal phages       | species     | Y |
| POG0897 | 354259  | 936 group of lactococcal phages       | species     | Y |
| POG0820 | 386445  | Bacteriophage 53 sensu lato           | species     | N |
| POG0034 | 542835  | Autographivirinae                     | subfamily   | Y |
| POG0031 | 542835  | Autographivirinae                     | subfamily   | N |
| POG0644 | 542836  | Nanovirinae                           | subfamily   | Y |
| POG3382 | 686565  | Gokushovirinae                        | subfamily   | Y |
| POG0061 | 857473  | Spounavirinae                         | subfamily   | Y |
| POG0072 | 857473  | Spounavirinae                         | subfamily   | Y |
| POG0567 | 857479  | Peduovirinae                          | subfamily   | Y |
| POG0568 | 857479  | Peduovirinae                          | subfamily   | Y |
| POG0566 | 857479  | Peduovirinae                          | subfamily   | Y |
| POG0455 | 1198136 | Tevenvirinae                          | subfamily   | Y |
| POG0172 | 10239   | Vira                                  | undef       | N |

Table S2 - refG prophages

**Table S2 -Prophage regions in reference bacterial genomes that were Identified in th 252 Gut Metagenomic Samples, Their Prevalenc**

| <b>Bacterial Genome</b>                    | <b>taxid.NCBIprojectID.locus</b> | <b>Prophage Region (taxid.projid.locus_start_stop)</b> |
|--------------------------------------------|----------------------------------|--------------------------------------------------------|
| Bacteroides sp. 1_1_30                     | 457387.68191.NZ_ADCL01000048     | 457387.68191.NZ_ADCL01000048_186550_252612             |
| Bacteroides sp. 9_1_42FAA                  | 457395.55587.NZ_EQ973128         | 457395.55587.NZ_EQ973128_174638_241353                 |
| Bacteroides sp. 2_2_4                      | 469590.55581.NZ_EQ973359         | 469590.55581.NZ_EQ973359_342643_366164                 |
| Bacteroides ovatus ATCC 8483               | 411476.54543.NZ_AAXF02000054     | 411476.54543.NZ_AAXF02000054_17506_58034               |
| Bacteroides stercoris ATCC 43183           | 449673.54825.NZ_ABFZ02000020     | 449673.54825.NZ_ABFZ02000020_103161_133419             |
| Bacteroides sp. 20_3                       | 469591.50765.NZ_GG774987         | 469591.50765.NZ_GG774987_342482_366139                 |
| Bacteroides sp. 3_1_33FAA                  | 457391.41705.NZ_GG705227         | 457391.41705.NZ_GG705227_672728_699329                 |
| Bacteroides sp. 9_1_42FAA                  | 457395.55587.NZ_EQ973126         | 457395.55587.NZ_EQ973126_637669_665814                 |
| Alistipes shahii WAL 8301                  | 717959.45913.FP929032            | 717959.45913.FP929032_169106_212150                    |
| Bacteroides stercoris ATCC 43183           | 449673.54825.NZ_ABFZ02000016     | 449673.54825.NZ_ABFZ02000016_92495_153157              |
| Bacteroides sp. 1_1_6                      | 469586.55577.NZ_GG695902         | 469586.55577.NZ_GG695902_90099_130510                  |
| Faecalibacterium prausnitzii A2-165        | 411483.54551.NZ_ACOP02000073     | 411483.54551.NZ_ACOP02000073_77495_148777              |
| Bacteroides vulgatus ATCC 8482             | 435590.58253.NC_009614           | 435590.58253.NC_009614_3600996_3640710                 |
| Faecalibacterium prausnitzii A2-165        | 411483.54551.NZ_ACOP02000009     | 411483.54551.NZ_ACOP02000009_365_11814                 |
| Clostridiales bacterium 1_7_47FAA          | 457421.55287.NZ_DS990262         | 457421.55287.NZ_DS990262_142245_182164                 |
| Clostridium bolteae ATCC BAA-613           | 411902.54523.NZ_ABCC02000034     | 411902.54523.NZ_ABCC02000034_29527_128941              |
| Bacteroides sp. 2_1_16                     | 469587.41707.NZ_GG705209         | 469587.41707.NZ_GG705209_1211658_1229148               |
| Parabacteroides merdae ATCC 43184          | 411477.54545.NZ_AAXE02000102     | 411477.54545.NZ_AAXE02000102_311200_382618             |
| Bacteroides sp. 3_1_23                     | 457390.49963.NZ_GG774949         | 457390.49963.NZ_GG774949_1661867_1702632               |
| Pseudoflavonifractor capillosus ATCC 29799 | 411467.54531.NZ_AAXG02000028     | 411467.54531.NZ_AAXG02000028_63267_221199              |
| Bacteroides sp. 2_1_16                     | 469587.41707.NZ_GG705209         | 469587.41707.NZ_GG705209_1126479_1197098               |
| Ruminococcus bromii L2-63                  | 657321.39153.FP929051            | 657321.39153.FP929051_419791_440282                    |
| Bifidobacterium longum DJO10A              | 205913.58833.NC_010816           | 205913.58833.NC_010816_24635_40803                     |
| Bacteroides sp. 3_1_23                     | 457390.49963.NZ_GG774949         | 457390.49963.NZ_GG774949_1890797_1907195               |
| Bacteroides sp. 3_1_23                     | 457390.49963.NZ_GG774949         | 457390.49963.NZ_GG774949_1625151_1647307               |
| Eubacterium rectale DSM 17629              | 657318.39159.FP929042            | 657318.39159.FP929042_3056410_3114493                  |
| Bacteroides sp. 3_1_19                     | 469592.49705.NZ_GG774761         | 469592.49705.NZ_GG774761_446527_480157                 |
| Ruminococcus obeum A2-162                  | 657314.39167.FP929054            | 657314.39167.FP929054_791554_847791                    |
| Butyrivibrio crossotus DSM 2876            | 511680.55091.NZ_ABWN01000028     | 511680.55091.NZ_ABWN01000028_5736_32826                |
| Bacteroides fragilis 3_1_12                | 457424.55575.NZ_EQ973214         | 457424.55575.NZ_EQ973214_544111_589188                 |
| Ruminococcus torques ATCC 27756            | 411460.54511.NZ_AAVP02000003     | 411460.54511.NZ_AAVP02000003_28318_88852               |
| Ruminococcus sp. 5_1_39BFAA                | 457412.55629.NZ_GG696045         | 457412.55629.NZ_GG696045_305191_333839                 |
| Odoribacter splanchnicus DSM 20712         | 709991.63397.NC_015160           | 709991.63397.NC_015160_954145_970823                   |
| Subdoligranulum variabile DSM 15176        | 411471.54539.NZ_ACBY02000014     | 411471.54539.NZ_ACBY02000014_147554_179555             |
| Clostridium cf. saccharolyticum K10        | 717608.45855.FP929037            | 717608.45855.FP929037_514091_535651                    |

Table S2 - refG prophages

|                                        |                               |                                            |
|----------------------------------------|-------------------------------|--------------------------------------------|
| Bacteroides sp. 3_1_19                 | 469592.49705.NZ_GG774760      | 469592.49705.NZ_GG774760_646758_661189     |
| Faecalibacterium prausnitzii A2-165    | 411483.54551.NZ_ACOP02000091  | 411483.54551.NZ_ACOP02000091_29755_72225   |
| Bacteroides sp. 1_1_6                  | 469586.55577.NZ_GG695899      | 469586.55577.NZ_GG695899_456277_507973     |
| Faecalibacterium prausnitzii L2-6      | 718252.45961.FP929045         | 718252.45961.FP929045_1622989_1691624      |
| Bacteroides ovatus ATCC 8483           | 411476.54543.NZ_AAXF02000052  | 411476.54543.NZ_AAXF02000052_228044_266119 |
| Faecalibacterium prausnitzii L2-6      | 718252.45961.FP929045         | 718252.45961.FP929045_26945_74593          |
| Faecalibacterium prausnitzii M21/2     | 411485.54555.NZ_ABED02000029  | 411485.54555.NZ_ABED02000029_836447_917396 |
| Faecalibacterium prausnitzii M21/2     | 411485.54555.NZ_ABED02000025  | 411485.54555.NZ_ABED02000025_159406_265713 |
| Clostridium saccharolyticum WM1        | 610130.51419.NC_014376        | 610130.51419.NC_014376_4035542_4048366     |
| Bacteroides sp. 2_2_4                  | 469590.55581.NZ_EQ973359      | 469590.55581.NZ_EQ973359_483045_538995     |
| Eubacterium rectale ATCC 33656         | 515619.59169.NC_012781        | 515619.59169.NC_012781_1139733_1190813     |
| Clostridium leptum DSM 753             | 428125.54605.NZ_ABCB02000017  | 428125.54605.NZ_ABCB02000017_74835_193302  |
| Ruminococcus torques L2-14             | 657313.39169.FP929055         | 657313.39169.FP929055_82920_135690         |
| Bacteroides sp. 2_1_22                 | 469588.41621.NZ_GG705175      | 469588.41621.NZ_GG705175_694903_755690     |
| Eubacterium siraeum 70/3               | 657319.39157.FP929044         | 657319.39157.FP929044_1599526_1612014      |
| Eubacterium rectale ATCC 33656         | 515619.59169.NC_012781        | 515619.59169.NC_012781_1925561_1993269     |
| Bacteroides sp. 20_3                   | 469591.50765.NZ_GG774987      | 469591.50765.NZ_GG774987_780370_801902     |
| Bacteroides xylanisolvens XB1A         | 657309.39177.FP929033         | 657309.39177.FP929033_966470_1018297       |
| Bacteroides fragilis 3_1_12            | 457424.55575.NZ_EQ973214      | 457424.55575.NZ_EQ973214_92214_117520      |
| Parabacteroides distasonis ATCC 8503   | 435591.58301.NC_009615        | 435591.58301.NC_009615_995121_1045804      |
| Bacteroides sp. 3_1_19                 | 469592.49705.NZ_GG774762      | 469592.49705.NZ_GG774762_154131_173944     |
| Ruminococcus bromii L2-63              | 657321.39153.FP929051         | 657321.39153.FP929051_246701_289340        |
| [Bacteroides] pectinophilus ATCC 43243 | 483218.54987.NZ_ABVQ01000036  | 483218.54987.NZ_ABVQ01000036_4827_63278    |
| Roseburia intestinalis XB6B4           | 718255.45953.FP929050         | 718255.45953.FP929050_3989067_4039883      |
| Methanobrevibacter smithii ATCC 35061  | 420247.58827.NC_009515        | 420247.58827.NC_009515_1697221_1721725     |
| Anaerotruncus colihominis DSM 17241    | 445972.54807.NZ_ABGD02000003  | 445972.54807.NZ_ABGD02000003_44922_126081  |
| butyrate-producing bacterium SS3/4     | 245014.39155.FP929062         | 245014.39155.FP929062_3015515_3071839      |
| Eubacterium siraeum 70/3               | 657319.39157.FP929044         | 657319.39157.FP929044_2141557_2187453      |
| Clostridium cellulovorans 743B         | 573061.51503.NC_014393        | 573061.51503.NC_014393_4776423_4835514     |
| Megasphaera sp. UPII 135-E             | 1000569.71191.NZ_AFUG01000007 | 1000569.71191.NZ_AFUG01000007_6385_69474   |
| butyrate-producing bacterium SS3/4     | 245014.39155.FP929062         | 245014.39155.FP929062_215841_293853        |
| Eubacterium rectale DSM 17629          | 657318.39159.FP929042         | 657318.39159.FP929042_1506108_1538396      |
| Gardnerella vaginalis 409-05           | 553190.43211.NC_013721        | 553190.43211.NC_013721_977173_999249       |
| butyrate-producing bacterium SSC/2     | 245018.45957.FP929061         | 245018.45957.FP929061_50542_88580          |
| Ruminococcus torques ATCC 27756        | 411460.54511.NZ_AAVP02000011  | 411460.54511.NZ_AAVP02000011_32895_83826   |
| Clostridiales bacterium 1_7_47FAA      | 457421.55287.NZ_DS990261      | 457421.55287.NZ_DS990261_853152_892459     |
| Clostridium bolteae ATCC BAA-613       | 411902.54523.NZ_ABCC02000033  | 411902.54523.NZ_ABCC02000033_141849_174342 |

Table S2 - refG prophages

|                                            |                              |                                            |
|--------------------------------------------|------------------------------|--------------------------------------------|
| Ruminococcus torques ATCC 27756            | 411460.54511.NZ_AAVP02000001 | 411460.54511.NZ_AAVP02000001_385201_449417 |
| Roseburia intestinalis M50/1               | 657315.39165.FP929049        | 657315.39165.FP929049_3659725_3698386      |
| Burkholderiales bacterium 1_1_47           | 469610.51545.NZ_GL383997     | 469610.51545.NZ_GL383997_105407_169431     |
| Streptococcus pyogenes MGAS10394           | 286636.58105.NC_006086       | 286636.58105.NC_006086_1118971_1173256     |
| Clostridium leptum DSM 753                 | 428125.54605.NZ_ABCB02000018 | 428125.54605.NZ_ABCB02000018_181402_233637 |
| Bifidobacterium adolescentis L2-32         | 411481.54549.NZ_AAXD02000028 | 411481.54549.NZ_AAXD02000028_201419_287098 |
| Ruminococcus sp. SR1/5                     | 657323.39149.FP929053        | 657323.39149.FP929053_220856_239836        |
| Clostridium cellulolyticum H10             | 394503.58709.NC_011898       | 394503.58709.NC_011898_3365305_3418753     |
| Faecalibacterium prausnitzii SL3/3         | 657322.39151.FP929046        | 657322.39151.FP929046_2692869_2745505      |
| Dorea formicigenerans ATCC 27755           | 411461.54513.NZ_AAXA02000009 | 411461.54513.NZ_AAXA02000009_116431_211230 |
| Burkholderiales bacterium 1_1_47           | 469610.51545.NZ_GL383997     | 469610.51545.NZ_GL383997_40963_88345       |
| Clostridium kluyveri DSM 555               | 431943.58885.NC_009706       | 431943.58885.NC_009706_2689132_2762463     |
| Clostridium leptum DSM 753                 | 428125.54605.NZ_ABCB02000021 | 428125.54605.NZ_ABCB02000021_273840_337832 |
| butyrate-producing bacterium SSC/2         | 245018.45957.FP929061        | 245018.45957.FP929061_2578900_2630235      |
| Faecalibacterium prausnitzii A2-165        | 411483.54551.NZ_ACOP02000049 | 411483.54551.NZ_ACOP02000049_30390_77436   |
| butyrate-producing bacterium SSC/2         | 245018.45957.FP929061        | 245018.45957.FP929061_2961127_2984099      |
| Mobiluncus curtisii ATCC 43063             | 548479.49695.NC_014246       | 548479.49695.NC_014246_1423112_1479518     |
| Dorea formicigenerans ATCC 27755           | 411461.54513.NZ_AAXA02000011 | 411461.54513.NZ_AAXA02000011_114374_187343 |
| Clostridium kluyveri NBRC 12016            | 583346.59369.NC_011837       | 583346.59369.NC_011837_2603263_2689130     |
| Faecalibacterium prausnitzii L2-6          | 718252.45961.FP929045        | 718252.45961.FP929045_636086_666284        |
| Ruminococcus sp. 5_1_39BFAA                | 457412.55629.NZ_GG696046     | 457412.55629.NZ_GG696046_272439_338857     |
| Collinsella aerofaciens ATCC 25986         | 411903.54525.NZ_AAVN02000001 | 411903.54525.NZ_AAVN02000001_262289_309092 |
| Shigella flexneri 2a str. 2457T            | 198215.57991.NC_004741       | 198215.57991.NC_004741_3385261_3411749     |
| Ruminococcus torques L2-14                 | 657313.39169.FP929055        | 657313.39169.FP929055_1905717_1947323      |
| Shigella flexneri 2a str. 301              | 198214.62907.NC_004337       | 198214.62907.NC_004337_3395178_3421573     |
| Bifidobacterium adolescentis L2-32         | 411481.54549.NZ_AAXD02000018 | 411481.54549.NZ_AAXD02000018_1099_13706    |
| Eubacterium siraeum V10Sc8a                | 717961.45919.FP929059        | 717961.45919.FP929059_494999_557467        |
| Coprococcus catus GD/7                     | 717962.45861.FP929038        | 717962.45861.FP929038_2013837_2036392      |
| Bifidobacterium longum DJO10A              | 205913.58833.NC_010816       | 205913.58833.NC_010816_1975326_1994586     |
| Streptococcus salivarius CCHSS3            | 1048332.70481.NC_015760      | 1048332.70481.NC_015760_22839_44980        |
| Bifidobacterium longum subsp. longum F8    | 722911.45963.FP929034        | 722911.45963.FP929034_1919862_1956791      |
| Acidaminococcus intestini RyC-MR95         | 568816.74445.NC_016077       | 568816.74445.NC_016077_1256703_1309295     |
| Ruminococcus sp. SR1/5                     | 657323.39149.FP929053        | 657323.39149.FP929053_1191860_1248849      |
| Bifidobacterium adolescentis L2-32         | 411481.54549.NZ_AAXD02000052 | 411481.54549.NZ_AAXD02000052_83678_120800  |
| Streptococcus salivarius CCHSS3            | 1048332.70481.NC_015760      | 1048332.70481.NC_015760_1262327_1291039    |
| Victivallis vadensis ATCC BAA-548          | 340101.54305.NZ_ABDE02000006 | 340101.54305.NZ_ABDE02000006_80211_128740  |
| Pseudoflavonifractor capillosus ATCC 29799 | 411467.54531.NZ_AAXG02000002 | 411467.54531.NZ_AAXG02000002_52750_115090  |

Table S2 - refG prophages

|                                                                       |                              |                                            |
|-----------------------------------------------------------------------|------------------------------|--------------------------------------------|
| <i>Shigella flexneri</i> 2a str. 301                                  | 198214.62907.NC_004337       | 198214.62907.NC_004337_4509204_4541262     |
| <i>Acidaminococcus intestini</i> RyC-MR95                             | 568816.74445.NC_016077       | 568816.74445.NC_016077_1899458_2010316     |
| <i>Bifidobacterium longum</i> subsp. <i>infantis</i> 157F             | 565040.62693.NC_015052       | 565040.62693.NC_015052_1206914_1246678     |
| <i>Bacillus cereus</i> B4264                                          | 405532.58757.NC_011725       | 405532.58757.NC_011725_526137_547688       |
| <i>Bifidobacterium longum</i> DJO10A                                  | 205913.58833.NC_010816       | 205913.58833.NC_010816_1321495_1356785     |
| [ <i>Bacteroides</i> ] <i>pectinophilus</i> ATCC 43243                | 483218.54987.NZ_ABVQ01000035 | 483218.54987.NZ_ABVQ01000035_415594_479275 |
| <i>Shigella flexneri</i> 2a str. 301                                  | 198214.62907.NC_004337       | 198214.62907.NC_004337_3605148_3646267     |
| <i>Acidaminococcus intestini</i> RyC-MR95                             | 568816.74445.NC_016077       | 568816.74445.NC_016077_1331206_1431157     |
| butyrate-producing bacterium SM4/1                                    | 245012.45955.FP929060        | 245012.45955.FP929060_617054_660927        |
| <i>Bifidobacterium longum</i> DJO10A                                  | 205913.54103.NZ_AABM02000005 | 205913.54103.NZ_AABM02000005_6282_33162    |
| <i>Bacteroides fragilis</i> 3_1_12                                    | 457424.55575.NZ_EQ973215     | 457424.55575.NZ_EQ973215_376243_399063     |
| <i>Bifidobacterium bifidum</i> S17                                    | 883062.59545.NC_014616       | 883062.59545.NC_014616_81037_124719        |
| <i>Escherichia coli</i> HS                                            | 331112.58393.NC_009800       | 331112.58393.NC_009800_450152_460516       |
| butyrate-producing bacterium SS3/4                                    | 245014.39155.FP929062        | 245014.39155.FP929062_2620851_2698296      |
| <i>Streptococcus thermophilus</i> LMD-9                               | 322159.58327.NC_008532       | 322159.58327.NC_008532_469888_497227       |
| <i>Escherichia coli</i> ED1a                                          | 585397.59379.NC_011745       | 585397.59379.NC_011745_2565511_2578087     |
| <i>Escherichia</i> sp. 3_2_53FAA                                      | 469598.55601.NZ_DS999459     | 469598.55601.NZ_DS999459_296146_316146     |
| Clostridiales bacterium 1_7_47FAA                                     | 457421.55287.NZ_DS990260     | 457421.55287.NZ_DS990260_1575043_1608234   |
| <i>Anaerotruncus colihominis</i> DSM 17241                            | 445972.54807.NZ_ABGD02000019 | 445972.54807.NZ_ABGD02000019_90436_128029  |
| <i>Clostridium bolteae</i> ATCC BAA-613                               | 411902.54523.NZ_ABCC02000048 | 411902.54523.NZ_ABCC02000048_1037_16159    |
| <i>Subdoligranulum variabile</i> DSM 15176                            | 411471.54539.NZ_ACBY02000054 | 411471.54539.NZ_ACBY02000054_57416_68041   |
| <i>Bifidobacterium longum</i> NCC2705                                 | 206672.57939.NC_004307       | 206672.57939.NC_004307_1295940_1312867     |
| <i>Escherichia coli</i> ATCC 8739                                     | 481805.58783.NC_010468       | 481805.58783.NC_010468_3719163_3730570     |
| <i>Clostridium bolteae</i> ATCC BAA-613                               | 411902.54523.NZ_ABCC02000001 | 411902.54523.NZ_ABCC02000001_85613_127632  |
| <i>Shigella sonnei</i> Ss046                                          | 300269.58217.NC_007384       | 300269.58217.NC_007384_2884693_2916444     |
| <i>Escherichia coli</i> HS                                            | 331112.58393.NC_009800       | 331112.58393.NC_009800_3015585_3027405     |
| <i>Escherichia</i> sp. 3_2_53FAA                                      | 469598.55601.NZ_DS999462     | 469598.55601.NZ_DS999462_509895_552140     |
| <i>Bacillus clausii</i> KSM-K16                                       | 66692.58237.NC_006582        | 66692.58237.NC_006582_1439784_1492638      |
| <i>Salmonella enterica</i> subsp. <i>enterica</i> serovar Typhimurium | 209261.57973.NC_004631       | 209261.57973.NC_004631_3501128_3545727     |
| <i>Shigella flexneri</i> 2a str. 2457T                                | 198215.57991.NC_004741       | 198215.57991.NC_004741_4365829_4405075     |
| <i>Escherichia coli</i> UTI89                                         | 364106.58541.NC_007946       | 364106.58541.NC_007946_897856_958060       |
| <i>Oligotropha carboxidovorans</i> OM5                                | 504832.72795.NC_015684       | 504832.72795.NC_015684_3295734_3357015     |
| <i>Streptococcus pneumoniae</i> AP200                                 | 574093.52453.NC_014494       | 574093.52453.NC_014494_12370_89253         |
| <i>Escherichia coli</i> 101-1                                         | 358709.54363.NZ_AAMK02000001 | 358709.54363.NZ_AAMK02000001_105168_119197 |
| <i>Streptococcus thermophilus</i> LMG 18311                           | 264199.58219.NC_006448       | 264199.58219.NC_006448_790359_824358       |
| <i>Bifidobacterium longum</i> subsp. <i>infantis</i> 157F             | 565040.62693.NC_015052       | 565040.62693.NC_015052_1006192_1068219     |
| <i>Escherichia coli</i> O103:H2 str. 12009                            | 585395.41013.NC_013353       | 585395.41013.NC_013353_571967_631372       |

Table S2 - refG prophages

|                                                         |                              |                                              |
|---------------------------------------------------------|------------------------------|----------------------------------------------|
| <i>Escherichia coli</i> 53638                           | 344610.54321.NZ_AAKB02000001 | 344610.54321.NZ_AAKB02000001_1834929_1875213 |
| <i>Escherichia coli</i> UTI89                           | 364106.58541.NC_007946       | 364106.58541.NC_007946_1241467_1305787       |
| <i>Escherichia coli</i> IAI39                           | 585057.59381.NC_011750       | 585057.59381.NC_011750_2735610_2796274       |
| <i>Dehalococcoides ethenogenes</i> 195                  | 243164.57763.NC_002936       | 243164.57763.NC_002936_961200_1021082        |
| <i>Shigella flexneri</i> 2a str. 301                    | 198214.62907.NC_004337       | 198214.62907.NC_004337_898668_952154         |
| <i>Escherichia coli</i> 53638                           | 344610.54321.NZ_AAKB02000001 | 344610.54321.NZ_AAKB02000001_3332186_3386416 |
| <i>Escherichia coli</i> O111:H- str. 11128              | 585396.41023.NC_013364       | 585396.41023.NC_013364_2838795_2864257       |
| <i>Escherichia coli</i> B str. REL606                   | 413997.58803.NC_012967       | 413997.58803.NC_012967_2100409_2143776       |
| <i>Lactobacillus reuteri</i> 100-23                     | 349123.54165.NZ_AAPZ02000001 | 349123.54165.NZ_AAPZ02000001_397013_461160   |
| <i>Shigella flexneri</i> 2a str. 301                    | 198214.62907.NC_004337       | 198214.62907.NC_004337_2030765_2095753       |
| <i>Bifidobacterium longum</i> subsp. infantis ATCC 15   | 391904.58677.NC_011593       | 391904.58677.NC_011593_1660928_1723489       |
| <i>Escherichia coli</i> IAI39                           | 585057.59381.NC_011750       | 585057.59381.NC_011750_1882552_1904933       |
| <i>Escherichia coli</i> O26:H11 str. 11368              | 573235.41021.NC_013361       | 573235.41021.NC_013361_2516898_2591095       |
| <i>Escherichia coli</i> E24377A                         | 331111.58395.NC_009801       | 331111.58395.NC_009801_1701981_1714260       |
| <i>Escherichia coli</i> ATCC 8739                       | 481805.58783.NC_010468       | 481805.58783.NC_010468_3139730_3164528       |
| <i>Ketogulonicigenium vulgare</i> Y25                   | 880591.59581.NC_014625       | 880591.59581.NC_014625_1944938_2000070       |
| <i>Escherichia coli</i> HS                              | 331112.58393.NC_009800       | 331112.58393.NC_009800_2798026_2823460       |
| <i>Salmonella enterica</i> subsp. enterica serovar Typh | 220341.57793.NC_003198       | 220341.57793.NC_003198_3494786_3560068       |
| <i>Shigella flexneri</i> 5 str. 8401                    | 373384.58583.NC_008258       | 373384.58583.NC_008258_1627210_1643338       |
| <i>Desulfovibrio piger</i> ATCC 29098                   | 411464.54519.NZ_ABXU01000033 | 411464.54519.NZ_ABXU01000033_1_12915         |
| <i>Shigella flexneri</i> 2a str. 2457T                  | 198215.57991.NC_004741       | 198215.57991.NC_004741_2007446_2067068       |
| <i>Escherichia coli</i> ED1a                            | 585397.59379.NC_011745       | 585397.59379.NC_011745_2009498_2070958       |
| <i>Veillonella</i> sp. 3_1_44                           | 457416.47845.NZ_GG770201     | 457416.47845.NZ_GG770201_381043_420806       |
| <i>Anaerotruncus colihominis</i> DSM 17241              | 445972.54807.NZ_ABGD02000005 | 445972.54807.NZ_ABGD02000005_245688_293153   |
| <i>Escherichia coli</i> IAI39                           | 585057.59381.NC_011750       | 585057.59381.NC_011750_1921935_2090060       |
| <i>Shigella flexneri</i> 5 str. 8401                    | 373384.58583.NC_008258       | 373384.58583.NC_008258_233200_319476         |
| <i>Shigella flexneri</i> 5 str. 8401                    | 373384.58583.NC_008258       | 373384.58583.NC_008258_1404289_1455338       |
| <i>Anaerotruncus colihominis</i> DSM 17241              | 445972.54807.NZ_ABGD02000014 | 445972.54807.NZ_ABGD02000014_1027_105003     |
| <i>Escherichia coli</i> O26:H11 str. 11368              | 573235.41021.NC_013361       | 573235.41021.NC_013361_3092601_3155332       |
| <i>Lactococcus lactis</i> subsp. lactis II1403          | 272623.57671.NC_002662       | 272623.57671.NC_002662_706695_729241         |
| <i>Lactococcus lactis</i> subsp. cremoris MG1363        | 416870.58837.NC_009004       | 416870.58837.NC_009004_695839_705929         |
| <i>Shigella flexneri</i> 2a str. 301                    | 198214.62907.NC_004337       | 198214.62907.NC_004337_4374732_4399077       |
| <i>Escherichia coli</i> F11                             | 340197.54299.NZ_AAJU02000016 | 340197.54299.NZ_AAJU02000016_1027_37997      |
| <i>Bacteroides fragilis</i> 3_1_12                      | 457424.55575.NZ_EQ973213     | 457424.55575.NZ_EQ973213_1647690_1683975     |
| <i>Ruminococcus champanellensis</i> 18P13               | 213810.39179.FP929052        | 213810.39179.FP929052_1897458_1922897        |
| <i>Lactococcus lactis</i> subsp. lactis II1403          | 272623.57671.NC_002662       | 272623.57671.NC_002662_2066475_2105688       |
| <i>Shigella flexneri</i> 5 str. 8401                    | 373384.58583.NC_008258       | 373384.58583.NC_008258_4351653_4369898       |

Table S2 - refG prophages

|                                                       |                              |                                            |
|-------------------------------------------------------|------------------------------|--------------------------------------------|
| <i>Escherichia coli</i> CFT073                        | 199310.57915.NC_004431       | 199310.57915.NC_004431_1394721_1446777     |
| <i>Erysipelotrichaceae bacterium</i> 2_2_44A          | 457422.73037.NZ_ADCZ01000002 | 457422.73037.NZ_ADCZ01000002_126177_136812 |
| <i>Escherichia coli</i> SE11                          | 409438.59425.NC_011415       | 409438.59425.NC_011415_2105912_2167346     |
| <i>Escherichia coli</i> E24377A                       | 331111.58395.NC_009801       | 331111.58395.NC_009801_2173089_2239760     |
| <i>Escherichia coli</i> ED1a                          | 585397.59379.NC_011745       | 585397.59379.NC_011745_2381497_2402869     |
| <i>Escherichia coli</i> 53638                         | 344610.54321.NZ_AAKB02000001 | 344610.54321.NZ_AAKB02000001_361146_386814 |
| <i>Shigella dysenteriae</i> Sd197                     | 300267.13145.NC_007606       | 300267.13145.NC_007606_2174616_2253854     |
| <i>Desulfovibrio piger</i> ATCC 29098                 | 411464.54519.NZ_ABXU01000029 | 411464.54519.NZ_ABXU01000029_1_67098       |
| <i>Lactococcus lactis</i> subsp. <i>lactis</i> II1403 | 272623.57671.NC_002662       | 272623.57671.NC_002662_615966_632941       |
| <i>Escherichia</i> sp. 3_2_53FAA                      | 469598.55601.NZ_DS999460     | 469598.55601.NZ_DS999460_731989_788925     |
| <i>Shigella flexneri</i> 2a str. 301                  | 198214.62907.NC_004337       | 198214.62907.NC_004337_866637_935972       |
| <i>Escherichia coli</i> UTI89                         | 364106.58541.NC_007946       | 364106.58541.NC_007946_2906465_2962748     |
| <i>Lactococcus lactis</i> subsp. <i>lactis</i> II1403 | 272623.57671.NC_002662       | 272623.57671.NC_002662_91052_110385        |
| <i>Anaerotruncus colihominis</i> DSM 17241            | 445972.54807.NZ_ABGD02000025 | 445972.54807.NZ_ABGD02000025_58871_159073  |
| <i>Escherichia coli</i> SE11                          | 409438.59425.NC_011415       | 409438.59425.NC_011415_2261815_2308960     |
| <i>Escherichia coli</i> UTI89                         | 364106.58541.NC_007946       | 364106.58541.NC_007946_2597497_2638903     |
| <i>Streptococcus</i> sp. C150                         | 435842.62525.NZ_GL698449     | 435842.62525.NZ_GL698449_1290097_1300970   |
| <i>Escherichia coli</i> E24377A                       | 331111.58395.NC_009801       | 331111.58395.NC_009801_998185_1019468      |
| <i>Erysipelotrichaceae bacterium</i> 2_2_44A          | 457422.73037.NZ_ADCZ01000025 | 457422.73037.NZ_ADCZ01000025_14597_62315   |
| <i>Shigella sonnei</i> Ss046                          | 300269.58217.NC_007384       | 300269.58217.NC_007384_2927053_2967135     |
| <i>Escherichia coli</i> IAI39                         | 585057.59381.NC_011750       | 585057.59381.NC_011750_1551760_1590848     |
| <i>Escherichia coli</i> O103:H2 str. 12009            | 585395.41013.NC_013353       | 585395.41013.NC_013353_5353463_5416147     |
| <i>Bifidobacterium bifidum</i> PRL2010                | 702459.59883.NC_014638       | 702459.59883.NC_014638_1045790_1111236     |
| <i>Escherichia coli</i> ED1a                          | 585397.59379.NC_011745       | 585397.59379.NC_011745_3016220_3070726     |
| <i>Escherichia coli</i> O111:H- str. 11128            | 585396.41023.NC_013364       | 585396.41023.NC_013364_2537511_2667760     |
| <i>Escherichia coli</i> O157:H7 str. TW14588          | 502346.55087.NZ_ABKY02000001 | 502346.55087.NZ_ABKY02000001_189500_213178 |
| <i>Escherichia coli</i> IAI39                         | 585057.59381.NC_011750       | 585057.59381.NC_011750_916451_935209       |
| <i>Clostridium bolteae</i> ATCC BAA-613               | 411902.54523.NZ_ABCC02000042 | 411902.54523.NZ_ABCC02000042_4448_65969    |
| <i>Shigella boydii</i> CDC 3083-94                    | 344609.58415.NC_010658       | 344609.58415.NC_010658_806826_947422       |
| <i>Escherichia coli</i> S88                           | 585035.62979.NC_011742       | 585035.62979.NC_011742_1181079_1231365     |
| <i>Escherichia coli</i> E110019                       | 340186.54303.NZ_AAJW02000023 | 340186.54303.NZ_AAJW02000023_17988_70706   |
| <i>Escherichia coli</i> O127:H6 str. E2348/69         | 574521.59343.NC_011601       | 574521.59343.NC_011601_710136_770698       |
| <i>Escherichia coli</i> str. K-12 substr. DH10B       | 316385.58979.NC_010473       | 316385.58979.NC_010473_1499420_1521094     |
| <i>Escherichia coli</i> O127:H6 str. E2348/69         | 574521.59343.NC_011601       | 574521.59343.NC_011601_1268129_1313369     |
| <i>Escherichia coli</i> O26:H11 str. 11368            | 573235.41021.NC_013361       | 573235.41021.NC_013361_3035874_3049938     |
| <i>Lactococcus lactis</i> subsp. <i>cremoris</i> SK11 | 272622.57983.NC_008527       | 272622.57983.NC_008527_1663287_1692919     |
| <i>Lactococcus lactis</i> subsp. <i>lactis</i> II1403 | 272623.57671.NC_002662       | 272623.57671.NC_002662_35516_56120         |

Table S2 - refG prophages

|                                                          |                              |                                              |
|----------------------------------------------------------|------------------------------|----------------------------------------------|
| <i>Escherichia coli</i> ED1a                             | 585397.59379.NC_011745       | 585397.59379.NC_011745_909097_956824         |
| <i>Escherichia coli</i> O157:H7 str. EC4076              | 444453.54967.NZ_ABHQ01000015 | 444453.54967.NZ_ABHQ01000015_11649_108285    |
| <i>Escherichia coli</i> O111:H- str. 11128               | 585396.41023.NC_013364       | 585396.41023.NC_013364_1183584_1278700       |
| <i>Escherichia coli</i> O111:H- str. 11128               | 585396.41023.NC_013364       | 585396.41023.NC_013364_1730826_1770952       |
| <i>Escherichia coli</i> S88                              | 585035.62979.NC_011742       | 585035.62979.NC_011742_2798408_2895086       |
| <i>Escherichia coli</i> str. K-12 substr. MG1655         | 511145.57779.NC_000913       | 511145.57779.NC_000913_564038_580602         |
| <i>Escherichia coli</i> 53638                            | 344610.54321.NZ_AAKB02000001 | 344610.54321.NZ_AAKB02000001_3905690_3957429 |
| <i>Escherichia coli</i> str. K-12 substr. DH10B          | 316385.58979.NC_010473       | 316385.58979.NC_010473_505693_519934         |
| <i>Escherichia coli</i> S88                              | 585035.62979.NC_011742       | 585035.62979.NC_011742_558506_610138         |
| <i>Bifidobacterium bifidum</i> NCIMB 41171               | 398513.55283.NZ_DS990229     | 398513.55283.NZ_DS990229_965936_1006071      |
| <i>Shigella flexneri</i> 5 str. 8401                     | 373384.58583.NC_008258       | 373384.58583.NC_008258_1920472_1970425       |
| <i>Escherichia coli</i> IAI39                            | 585057.59381.NC_011750       | 585057.59381.NC_011750_527470_560126         |
| <i>Yersinia enterocolitica</i> subsp. palearctica 105.5R | 994476.63663.NC_015224       | 994476.63663.NC_015224_2476620_2495330       |
| <i>Escherichia coli</i> E110019                          | 340186.54303.NZ_AAJW02000001 | 340186.54303.NZ_AAJW02000001_24195_73774     |
| <i>Escherichia coli</i> O127:H6 str. E2348/69            | 574521.59343.NC_011601       | 574521.59343.NC_011601_1038706_1086323       |
| <i>Desulfovibrio piger</i> ATCC 29098                    | 411464.54519.NZ_ABXU01000046 | 411464.54519.NZ_ABXU01000046_1_10055         |
| <i>Escherichia coli</i> CFT073                           | 199310.57915.NC_004431       | 199310.57915.NC_004431_3021386_3068634       |
| <i>Shigella sonnei</i> Ss046                             | 300269.58217.NC_007384       | 300269.58217.NC_007384_2536277_2587001       |
| <i>Escherichia coli</i> UMN026                           | 585056.62981.NC_011751       | 585056.62981.NC_011751_1345931_1452216       |
| <i>Escherichia coli</i> HS                               | 331112.58393.NC_009800       | 331112.58393.NC_009800_917273_967024         |
| <i>Escherichia coli</i> 101-1                            | 358709.54363.NZ_AAMK02000006 | 358709.54363.NZ_AAMK02000006_46629_80435     |
| <i>Escherichia coli</i> O26:H11 str. 11368               | 573235.41021.NC_013361       | 573235.41021.NC_013361_3614377_3684457       |
| <i>Escherichia coli</i> SMS-3-5                          | 439855.58919.NC_010498       | 439855.58919.NC_010498_1162007_1215520       |
| <i>Escherichia coli</i> ED1a                             | 585397.59379.NC_011745       | 585397.59379.NC_011745_1654974_1723756       |
| <i>Escherichia coli</i> HS                               | 331112.58393.NC_009800       | 331112.58393.NC_009800_2062900_2101925       |
| <i>Lactococcus lactis</i> subsp. <i>lactis</i> II1403    | 272623.57671.NC_002662       | 272623.57671.NC_002662_447236_534142         |
| <i>Escherichia coli</i> O157:H7 str. EDL933              | 155864.57831.NC_002655       | 155864.57831.NC_002655_2668339_2698542       |
| <i>Escherichia coli</i> O111:H- str. 11128               | 585396.41023.NC_013364       | 585396.41023.NC_013364_3317427_3369631       |
| <i>Shigella flexneri</i> 5 str. 8401                     | 373384.58583.NC_008258       | 373384.58583.NC_008258_932840_942909         |
| <i>Escherichia</i> sp. 3_2_53FAA                         | 469598.55601.NZ_DS999459     | 469598.55601.NZ_DS999459_1172_42242          |
| <i>Escherichia coli</i> SE11                             | 409438.59425.NC_011415       | 409438.59425.NC_011415_1475428_1526058       |
| <i>Escherichia coli</i> O157:H7 str. TW14359             | 544404.59235.NC_013008       | 544404.59235.NC_013008_3905150_3937999       |
| <i>Escherichia coli</i> O26:H11 str. 11368               | 573235.41021.NC_013361       | 573235.41021.NC_013361_2667387_2714788       |
| <i>Escherichia coli</i> O157:H7 str. EC4024              | 444454.54969.NZ_ABJT01000011 | 444454.54969.NZ_ABJT01000011_15153_48002     |
| <i>Escherichia coli</i> B str. REL606                    | 413997.58803.NC_012967       | 413997.58803.NC_012967_777183_795295         |
| <i>Escherichia coli</i> S88                              | 585035.62979.NC_011742       | 585035.62979.NC_011742_2493355_2534529       |
| <i>Escherichia coli</i> 101-1                            | 358709.54363.NZ_AAMK02000007 | 358709.54363.NZ_AAMK02000007_82521_97993     |

Table S2 - refG prophages

|                                                           |                               |                                             |
|-----------------------------------------------------------|-------------------------------|---------------------------------------------|
| <i>Campylobacter hominis</i> ATCC BAA-381                 | 360107.58981.NC_009714        | 360107.58981.NC_009714_226887_258246        |
| <i>Escherichia coli</i> O111:H- str. 11128                | 585396.41023.NC_013364        | 585396.41023.NC_013364_2380989_2440449      |
| <i>Escherichia coli</i> B171                              | 344601.54319.NZ_AAJX02000004  | 344601.54319.NZ_AAJX02000004_46853_99394    |
| <i>Lactococcus lactis</i> subsp. <i>cremoris</i> MG1363   | 416870.58837.NC_009004        | 416870.58837.NC_009004_1226569_1239384      |
| <i>Lactobacillus ruminis</i> ATCC 27782                   | 1069534.73417.NC_015975       | 1069534.73417.NC_015975_765605_815530       |
| <i>Desulfovibrio piger</i> ATCC 29098                     | 411464.54519.NZ_ABXU01000024  | 411464.54519.NZ_ABXU01000024_858_36831      |
| <i>Escherichia coli</i> HS                                | 331112.58393.NC_009800        | 331112.58393.NC_009800_291831_358026        |
| <i>Escherichia coli</i> S88                               | 585035.62979.NC_011742        | 585035.62979.NC_011742_2169276_2206219      |
| <i>Escherichia coli</i> SMS-3-5                           | 439855.58919.NC_010498        | 439855.58919.NC_010498_955827_970723        |
| <i>Escherichia coli</i> IAI1                              | 585034.59377.NC_011741        | 585034.59377.NC_011741_2711042_2765231      |
| <i>Escherichia coli</i> UMN026                            | 585056.62981.NC_011751        | 585056.62981.NC_011751_1837393_1891630      |
| <i>Escherichia coli</i> UMN026                            | 585056.62981.NC_011751        | 585056.62981.NC_011751_644943_687075        |
| <i>Escherichia coli</i> 101-1                             | 358709.54363.NZ_AAMK02000005  | 358709.54363.NZ_AAMK02000005_1841_13342     |
| <i>Lactococcus lactis</i> subsp. <i>lactis</i> II1403     | 272623.57671.NC_002662        | 272623.57671.NC_002662_1032978_1090456      |
| <i>Escherichia coli</i> O26:H11 str. 11368                | 573235.41021.NC_013361        | 573235.41021.NC_013361_1465781_1521344      |
| <i>Escherichia coli</i> O157:H7 str. TW14588              | 502346.55087.NZ_ABKY02000005  | 502346.55087.NZ_ABKY02000005_192313_253457  |
| <i>Escherichia fergusonii</i> ATCC 35469                  | 585054.59375.NC_011740        | 585054.59375.NC_011740_2752630_2795009      |
| <i>Lactobacillus ruminis</i> SPM0211                      | 1040964.67955.NZ_AFOJ01000007 | 1040964.67955.NZ_AFOJ01000007_330416_376982 |
| <i>Escherichia coli</i> O26:H11 str. 11368                | 573235.41021.NC_013361        | 573235.41021.NC_013361_612093_657903        |
| <i>Escherichia coli</i> O111:H- str. 11128                | 585396.41023.NC_013364        | 585396.41023.NC_013364_4952779_5000205      |
| <i>Escherichia coli</i> E110019                           | 340186.54303.NZ_AAJW02000001  | 340186.54303.NZ_AAJW02000001_305629_316506  |
| <i>Klebsiella pneumoniae</i> subsp. <i>pneumoniae</i> MGH | 272620.57619.NC_009648        | 272620.57619.NC_009648_3798567_3834957      |
| <i>Enterobacter asburiae</i> LF7a                         | 640513.72793.NC_015968        | 640513.72793.NC_015968_4253610_4268248      |
| <i>Klebsiella variicola</i> At-22                         | 640131.42113.NC_013850        | 640131.42113.NC_013850_1890403_1946448      |
| <i>Lactobacillus reuteri</i> 100-23                       | 349123.54165.NZ_AAPZ02000001  | 349123.54165.NZ_AAPZ02000001_118182_176007  |

Table S2 - refG prophages

**Pre and Lytic Activity**

| start coord | stop coord | NumbSamples | In * Sum Proph | Abund    | Numb Samples | PtoH>10 |
|-------------|------------|-------------|----------------|----------|--------------|---------|
| 186550      | 252612     | 192         |                | 19693.91 |              | 190     |
| 174638      | 241353     | 150         |                | 18786.52 |              | 8       |
| 342643      | 366164     | 207         |                | 16786.32 |              | 192     |
| 17506       | 58034      | 239         |                | 11773.17 |              | 236     |
| 103161      | 133419     | 125         |                | 10399.42 |              | 73      |
| 342482      | 366139     | 127         |                | 10168.89 |              | 118     |
| 672728      | 699329     | 232         |                | 9713.15  |              | 120     |
| 637669      | 665814     | 177         |                | 8645.84  |              | 7       |
| 169106      | 212150     | 98          |                | 6185.76  |              | 6       |
| 92495       | 153157     | 162         |                | 5845.98  |              | 39      |
| 90099       | 130510     | 93          |                | 5634.61  |              | 75      |
| 77495       | 148777     | 242         |                | 4982.09  |              | 177     |
| 3600996     | 3640710    | 186         |                | 4603.52  |              | 0       |
| 365         | 11814      | 244         |                | 4323.86  |              | 174     |
| 142245      | 182164     | 242         |                | 4093.27  |              | 239     |
| 29527       | 128941     | 248         |                | 3999.80  |              | 229     |
| 1211658     | 1229148    | 106         |                | 3898.77  |              | 106     |
| 311200      | 382618     | 209         |                | 3892.53  |              | 191     |
| 1661867     | 1702632    | 142         |                | 3415.51  |              | 0       |
| 63267       | 221199     | 242         |                | 3151.02  |              | 170     |
| 1126479     | 1197098    | 195         |                | 3132.26  |              | 167     |
| 419791      | 440282     | 129         |                | 2975.50  |              | 0       |
| 24635       | 40803      | 237         |                | 2723.16  |              | 229     |
| 1890797     | 1907195    | 90          |                | 2590.20  |              | 0       |
| 1625151     | 1647307    | 100         |                | 2562.99  |              | 0       |
| 3056410     | 3114493    | 239         |                | 2438.49  |              | 6       |
| 446527      | 480157     | 161         |                | 2099.13  |              | 5       |
| 791554      | 847791     | 242         |                | 1993.12  |              | 17      |
| 5736        | 32826      | 37          |                | 1940.64  |              | 0       |
| 544111      | 589188     | 94          |                | 1912.49  |              | 78      |
| 28318       | 88852      | 244         |                | 1877.75  |              | 228     |
| 305191      | 333839     | 137         |                | 1873.78  |              | 59      |
| 954145      | 970823     | 88          |                | 1847.42  |              | 13      |
| 147554      | 179555     | 224         |                | 1747.05  |              | 41      |
| 514091      | 535651     | 229         |                | 1691.33  |              | 127     |

Table S2 - refG prophages

|         |         |     |         |     |
|---------|---------|-----|---------|-----|
| 646758  | 661189  | 113 | 1621.80 | 0   |
| 29755   | 72225   | 182 | 1591.77 | 31  |
| 456277  | 507973  | 151 | 1507.23 | 43  |
| 1622989 | 1691624 | 179 | 1457.61 | 0   |
| 228044  | 266119  | 106 | 1384.40 | 22  |
| 26945   | 74593   | 217 | 1364.13 | 2   |
| 836447  | 917396  | 223 | 1208.99 | 15  |
| 159406  | 265713  | 170 | 1137.39 | 0   |
| 4035542 | 4048366 | 194 | 1133.56 | 96  |
| 483045  | 538995  | 119 | 1132.75 | 72  |
| 1139733 | 1190813 | 167 | 1075.26 | 0   |
| 74835   | 193302  | 174 | 1044.20 | 174 |
| 82920   | 135690  | 125 | 1037.98 | 11  |
| 694903  | 755690  | 113 | 1024.55 | 88  |
| 1599526 | 1612014 | 79  | 989.63  | 0   |
| 1925561 | 1993269 | 131 | 922.43  | 4   |
| 780370  | 801902  | 168 | 901.32  | 145 |
| 966470  | 1018297 | 105 | 873.41  | 0   |
| 92214   | 117520  | 16  | 861.32  | 15  |
| 995121  | 1045804 | 136 | 857.39  | 5   |
| 154131  | 173944  | 89  | 765.59  | 0   |
| 246701  | 289340  | 114 | 708.78  | 10  |
| 4827    | 63278   | 78  | 655.38  | 39  |
| 3989067 | 4039883 | 108 | 634.84  | 0   |
| 1697221 | 1721725 | 10  | 634.19  | 4   |
| 44922   | 126081  | 113 | 632.08  | 113 |
| 3015515 | 3071839 | 72  | 609.35  | 15  |
| 2141557 | 2187453 | 63  | 602.71  | 0   |
| 4776423 | 4835514 | 157 | 551.87  | 157 |
| 6385    | 69474   | 143 | 528.12  | 0   |
| 215841  | 293853  | 60  | 489.25  | 7   |
| 1506108 | 1538396 | 86  | 487.92  | 0   |
| 977173  | 999249  | 63  | 467.80  | 63  |
| 50542   | 88580   | 145 | 448.55  | 0   |
| 32895   | 83826   | 74  | 401.69  | 50  |
| 853152  | 892459  | 74  | 370.76  | 74  |
| 141849  | 174342  | 74  | 365.33  | 74  |

Table S2 - refG prophages

|         |         |     |        |     |
|---------|---------|-----|--------|-----|
| 385201  | 449417  | 111 | 363.41 | 100 |
| 3659725 | 3698386 | 73  | 327.00 | 0   |
| 105407  | 169431  | 69  | 325.64 | 25  |
| 1118971 | 1173256 | 58  | 306.08 | 58  |
| 181402  | 233637  | 61  | 290.67 | 42  |
| 201419  | 287098  | 68  | 268.56 | 1   |
| 220856  | 239836  | 99  | 266.34 | 1   |
| 3365305 | 3418753 | 72  | 230.50 | 72  |
| 2692869 | 2745505 | 69  | 218.65 | 0   |
| 116431  | 211230  | 76  | 209.46 | 1   |
| 40963   | 88345   | 31  | 200.63 | 21  |
| 2689132 | 2762463 | 69  | 188.61 | 69  |
| 273840  | 337832  | 48  | 187.26 | 6   |
| 2578900 | 2630235 | 72  | 186.97 | 0   |
| 30390   | 77436   | 36  | 175.05 | 9   |
| 2961127 | 2984099 | 49  | 170.35 | 2   |
| 1423112 | 1479518 | 61  | 163.33 | 61  |
| 114374  | 187343  | 55  | 163.28 | 0   |
| 2603263 | 2689130 | 62  | 161.32 | 62  |
| 636086  | 666284  | 51  | 157.80 | 0   |
| 272439  | 338857  | 42  | 152.71 | 10  |
| 262289  | 309092  | 30  | 147.47 | 8   |
| 3385261 | 3411749 | 29  | 136.43 | 29  |
| 1905717 | 1947323 | 48  | 128.85 | 0   |
| 3395178 | 3421573 | 26  | 123.31 | 26  |
| 1099    | 13706   | 16  | 122.15 | 4   |
| 494999  | 557467  | 48  | 121.89 | 27  |
| 2013837 | 2036392 | 11  | 102.43 | 2   |
| 1975326 | 1994586 | 27  | 100.31 | 14  |
| 22839   | 44980   | 22  | 89.92  | 2   |
| 1919862 | 1956791 | 11  | 86.47  | 6   |
| 1256703 | 1309295 | 22  | 77.53  | 0   |
| 1191860 | 1248849 | 22  | 72.00  | 1   |
| 83678   | 120800  | 14  | 71.11  | 7   |
| 1262327 | 1291039 | 15  | 67.53  | 0   |
| 80211   | 128740  | 17  | 61.95  | 17  |
| 52750   | 115090  | 11  | 60.62  | 0   |

Table S2 - refG prophages

|         |         |    |       |    |
|---------|---------|----|-------|----|
| 4509204 | 4541262 | 11 | 59.39 | 11 |
| 1899458 | 2010316 | 14 | 57.90 | 8  |
| 1206914 | 1246678 | 21 | 57.61 | 6  |
| 526137  | 547688  | 5  | 57.24 | 5  |
| 1321495 | 1356785 | 9  | 53.71 | 5  |
| 415594  | 479275  | 10 | 52.65 | 0  |
| 3605148 | 3646267 | 11 | 51.50 | 11 |
| 1331206 | 1431157 | 14 | 50.86 | 14 |
| 617054  | 660927  | 15 | 49.75 | 2  |
| 6282    | 33162   | 9  | 48.51 | 6  |
| 376243  | 399063  | 19 | 47.12 | 10 |
| 81037   | 124719  | 6  | 46.62 | 6  |
| 450152  | 460516  | 9  | 44.92 | 9  |
| 2620851 | 2698296 | 11 | 41.51 | 0  |
| 469888  | 497227  | 13 | 38.47 | 5  |
| 2565511 | 2578087 | 7  | 37.84 | 7  |
| 296146  | 316146  | 7  | 37.76 | 7  |
| 1575043 | 1608234 | 11 | 37.75 | 4  |
| 90436   | 128029  | 4  | 37.09 | 4  |
| 1037    | 16159   | 10 | 36.05 | 10 |
| 57416   | 68041   | 5  | 34.34 | 0  |
| 1295940 | 1312867 | 7  | 33.14 | 3  |
| 3719163 | 3730570 | 10 | 32.86 | 10 |
| 85613   | 127632  | 7  | 32.36 | 7  |
| 2884693 | 2916444 | 8  | 31.82 | 8  |
| 3015585 | 3027405 | 7  | 30.00 | 7  |
| 509895  | 552140  | 9  | 29.08 | 9  |
| 1439784 | 1492638 | 2  | 27.14 | 2  |
| 3501128 | 3545727 | 6  | 26.85 | 6  |
| 4365829 | 4405075 | 7  | 26.62 | 7  |
| 897856  | 958060  | 5  | 26.59 | 5  |
| 3295734 | 3357015 | 3  | 25.77 | 3  |
| 12370   | 89253   | 2  | 25.74 | 2  |
| 105168  | 119197  | 4  | 25.19 | 4  |
| 790359  | 824358  | 8  | 24.76 | 1  |
| 1006192 | 1068219 | 8  | 24.23 | 4  |
| 571967  | 631372  | 7  | 23.94 | 7  |

Table S2 - refG prophages

|         |         |   |       |   |
|---------|---------|---|-------|---|
| 1834929 | 1875213 | 7 | 23.64 | 7 |
| 1241467 | 1305787 | 4 | 23.31 | 4 |
| 2735610 | 2796274 | 7 | 23.07 | 7 |
| 961200  | 1021082 | 6 | 22.70 | 6 |
| 898668  | 952154  | 6 | 21.88 | 6 |
| 3332186 | 3386416 | 7 | 21.86 | 7 |
| 2838795 | 2864257 | 6 | 21.81 | 6 |
| 2100409 | 2143776 | 6 | 20.88 | 6 |
| 397013  | 461160  | 3 | 20.29 | 3 |
| 2030765 | 2095753 | 4 | 20.10 | 4 |
| 1660928 | 1723489 | 4 | 19.94 | 3 |
| 1882552 | 1904933 | 7 | 19.92 | 7 |
| 2516898 | 2591095 | 6 | 19.16 | 6 |
| 1701981 | 1714260 | 4 | 18.67 | 4 |
| 3139730 | 3164528 | 6 | 18.54 | 6 |
| 1944938 | 2000070 | 2 | 18.53 | 2 |
| 2798026 | 2823460 | 7 | 18.50 | 7 |
| 3494786 | 3560068 | 4 | 18.40 | 4 |
| 1627210 | 1643338 | 5 | 17.69 | 5 |
| 1       | 12915   | 8 | 17.65 | 8 |
| 2007446 | 2067068 | 4 | 17.54 | 4 |
| 2009498 | 2070958 | 4 | 17.53 | 4 |
| 381043  | 420806  | 2 | 16.87 | 2 |
| 245688  | 293153  | 5 | 16.83 | 5 |
| 1921935 | 2090060 | 5 | 16.55 | 5 |
| 233200  | 319476  | 5 | 16.49 | 5 |
| 1404289 | 1455338 | 5 | 16.22 | 5 |
| 1027    | 105003  | 2 | 16.00 | 2 |
| 3092601 | 3155332 | 4 | 15.95 | 4 |
| 706695  | 729241  | 3 | 15.65 | 1 |
| 695839  | 705929  | 4 | 15.60 | 4 |
| 4374732 | 4399077 | 6 | 15.47 | 6 |
| 1027    | 37997   | 3 | 15.44 | 3 |
| 1647690 | 1683975 | 6 | 15.34 | 2 |
| 1897458 | 1922897 | 3 | 15.32 | 0 |
| 2066475 | 2105688 | 4 | 15.06 | 4 |
| 4351653 | 4369898 | 6 | 14.97 | 6 |

Table S2 - refG prophages

|         |         |   |       |   |
|---------|---------|---|-------|---|
| 1394721 | 1446777 | 6 | 14.87 | 6 |
| 126177  | 136812  | 4 | 14.83 | 4 |
| 2105912 | 2167346 | 4 | 14.58 | 4 |
| 2173089 | 2239760 | 2 | 14.56 | 2 |
| 2381497 | 2402869 | 4 | 14.53 | 4 |
| 361146  | 386814  | 5 | 14.38 | 5 |
| 2174616 | 2253854 | 4 | 14.34 | 4 |
| 1       | 67098   | 5 | 14.34 | 5 |
| 615966  | 632941  | 3 | 14.30 | 3 |
| 731989  | 788925  | 3 | 14.25 | 3 |
| 866637  | 935972  | 5 | 14.12 | 3 |
| 2906465 | 2962748 | 3 | 13.98 | 3 |
| 91052   | 110385  | 3 | 13.92 | 3 |
| 58871   | 159073  | 3 | 13.79 | 3 |
| 2261815 | 2308960 | 2 | 13.63 | 2 |
| 2597497 | 2638903 | 2 | 13.51 | 2 |
| 1290097 | 1300970 | 2 | 13.26 | 2 |
| 998185  | 1019468 | 5 | 13.25 | 5 |
| 14597   | 62315   | 4 | 13.23 | 3 |
| 2927053 | 2967135 | 4 | 13.09 | 4 |
| 1551760 | 1590848 | 4 | 13.01 | 4 |
| 5353463 | 5416147 | 4 | 12.89 | 4 |
| 1045790 | 1111236 | 2 | 12.86 | 2 |
| 3016220 | 3070726 | 2 | 12.83 | 2 |
| 2537511 | 2667760 | 4 | 12.59 | 4 |
| 189500  | 213178  | 5 | 12.54 | 5 |
| 916451  | 935209  | 4 | 12.38 | 4 |
| 4448    | 65969   | 3 | 12.33 | 3 |
| 806826  | 947422  | 4 | 12.20 | 4 |
| 1181079 | 1231365 | 4 | 12.19 | 4 |
| 17988   | 70706   | 3 | 12.07 | 3 |
| 710136  | 770698  | 3 | 11.99 | 3 |
| 1499420 | 1521094 | 4 | 11.83 | 4 |
| 1268129 | 1313369 | 2 | 11.57 | 2 |
| 3035874 | 3049938 | 4 | 11.41 | 4 |
| 1663287 | 1692919 | 3 | 11.35 | 3 |
| 35516   | 56120   | 2 | 11.26 | 2 |

Table S2 - refG prophages

|         |         |   |       |   |
|---------|---------|---|-------|---|
| 909097  | 956824  | 3 | 11.20 | 3 |
| 11649   | 108285  | 3 | 11.19 | 3 |
| 1183584 | 1278700 | 3 | 11.14 | 3 |
| 1730826 | 1770952 | 3 | 11.00 | 3 |
| 2798408 | 2895086 | 3 | 10.96 | 3 |
| 564038  | 580602  | 2 | 10.90 | 2 |
| 3905690 | 3957429 | 3 | 10.84 | 3 |
| 505693  | 519934  | 3 | 10.73 | 3 |
| 558506  | 610138  | 3 | 10.61 | 3 |
| 965936  | 1006071 | 2 | 10.57 | 2 |
| 1920472 | 1970425 | 3 | 10.44 | 3 |
| 527470  | 560126  | 3 | 10.34 | 3 |
| 2476620 | 2495330 | 2 | 10.23 | 2 |
| 24195   | 73774   | 3 | 10.15 | 3 |
| 1038706 | 1086323 | 2 | 9.96  | 2 |
| 1       | 10055   | 5 | 9.92  | 5 |
| 3021386 | 3068634 | 4 | 9.88  | 4 |
| 2536277 | 2587001 | 2 | 9.60  | 2 |
| 1345931 | 1452216 | 4 | 9.51  | 3 |
| 917273  | 967024  | 2 | 9.41  | 2 |
| 46629   | 80435   | 3 | 9.37  | 3 |
| 3614377 | 3684457 | 3 | 8.95  | 3 |
| 1162007 | 1215520 | 4 | 8.93  | 2 |
| 1654974 | 1723756 | 2 | 8.70  | 2 |
| 2062900 | 2101925 | 4 | 8.63  | 4 |
| 447236  | 534142  | 2 | 8.57  | 2 |
| 2668339 | 2698542 | 2 | 8.50  | 2 |
| 3317427 | 3369631 | 2 | 8.41  | 2 |
| 932840  | 942909  | 3 | 8.25  | 3 |
| 1172    | 42242   | 2 | 8.23  | 2 |
| 1475428 | 1526058 | 2 | 8.10  | 2 |
| 3905150 | 3937999 | 3 | 7.97  | 3 |
| 2667387 | 2714788 | 2 | 7.91  | 2 |
| 15153   | 48002   | 3 | 7.82  | 3 |
| 777183  | 795295  | 2 | 7.76  | 2 |
| 2493355 | 2534529 | 2 | 7.57  | 2 |
| 82521   | 97993   | 4 | 7.38  | 4 |

Table S2 - refG prophages

|         |         |   |      |   |
|---------|---------|---|------|---|
| 226887  | 258246  | 2 | 7.37 | 0 |
| 2380989 | 2440449 | 3 | 7.07 | 2 |
| 46853   | 99394   | 3 | 6.93 | 3 |
| 1226569 | 1239384 | 2 | 6.78 | 2 |
| 765605  | 815530  | 2 | 6.61 | 0 |
| 858     | 36831   | 2 | 6.58 | 2 |
| 291831  | 358026  | 2 | 6.39 | 2 |
| 2169276 | 2206219 | 2 | 6.39 | 2 |
| 955827  | 970723  | 2 | 6.37 | 2 |
| 2711042 | 2765231 | 2 | 6.30 | 2 |
| 1837393 | 1891630 | 2 | 6.27 | 2 |
| 644943  | 687075  | 2 | 6.11 | 2 |
| 1841    | 13342   | 2 | 6.01 | 2 |
| 1032978 | 1090456 | 2 | 5.78 | 2 |
| 1465781 | 1521344 | 2 | 5.57 | 2 |
| 192313  | 253457  | 3 | 5.31 | 3 |
| 2752630 | 2795009 | 3 | 5.05 | 1 |
| 330416  | 376982  | 2 | 4.98 | 2 |
| 612093  | 657903  | 2 | 4.93 | 2 |
| 4952779 | 5000205 | 2 | 4.85 | 0 |
| 305629  | 316506  | 2 | 4.72 | 2 |
| 3798567 | 3834957 | 2 | 4.69 | 2 |
| 4253610 | 4268248 | 2 | 3.23 | 2 |
| 1890403 | 1946448 | 2 | 3.09 | 0 |
| 118182  | 176007  | 2 | 1.74 | 0 |

Table S3 - refG-proph Interact

**Table S3 - Reference Bacterial Genomes that were detected in the r**  
**bact.taxic Bacterial Genome**

1040964 *Lactobacillus ruminis* SPM0211  
 198214 *Shigella flexneri* 2a str. 301  
 198215 *Shigella flexneri* 2a str. 2457T  
 209261 *Salmonella enterica* subsp. *enterica* serovar Typhi str. Ty2  
 220341 *Salmonella enterica* subsp. *enterica* serovar Typhi str. CT18  
 272620 *Klebsiella pneumoniae* subsp. *pneumoniae* MGH 78578  
 300269 *Shigella sonnei* Ss046  
 331112 *Escherichia coli* HS  
 331112 *Escherichia coli* HS  
 340197 *Escherichia coli* F11  
 344610 *Escherichia coli* 53638  
 349123 *Lactobacillus reuteri* 100-23  
 364106 *Escherichia coli* UTI89  
 364106 *Escherichia coli* UTI89  
 409438 *Escherichia coli* SE11  
 411460 *Ruminococcus torques* ATCC 27756  
 411461 *Dorea formicigenerans* ATCC 27755  
 411464 *Desulfovibrio piger* ATCC 29098  
 411464 *Desulfovibrio piger* ATCC 29098  
 411464 *Desulfovibrio piger* ATCC 29098  
 411477 *Parabacteroides merdae* ATCC 43184  
 411902 *Clostridium bolteae* ATCC BAA-613  
 411903 *Collinsella aerofaciens* ATCC 25986  
 413997 *Escherichia coli* B str. REL606  
 428125 *Clostridium leptum* DSM 753  
 428125 *Clostridium leptum* DSM 753  
 435591 *Parabacteroides distasonis* ATCC 8503  
 445972 *Anaerotruncus colihominis* DSM 17241  
 445972 *Anaerotruncus colihominis* DSM 17241  
 457412 *Ruminococcus* sp. 5\_1\_39BFAA  
 457421 *Clostridiales bacterium* 1\_7\_47FAA  
 469591 *Bacteroides* sp. 20\_3  
 469598 *Escherichia* sp. 3\_2\_53FAA  
 469598 *Escherichia* sp. 3\_2\_53FAA  
 469610 *Burkholderiales bacterium* 1\_1\_47  
 469610 *Burkholderiales bacterium* 1\_1\_47  
 568816 *Acidaminococcus intestini* RyC-MR95  
 573235 *Escherichia coli* O26:H11 str. 11368  
 585034 *Escherichia coli* IAI1  
 585035 *Escherichia coli* S88  
 585035 *Escherichia coli* S88  
 585054 *Escherichia fergusonii* ATCC 35469  
 585057 *Escherichia coli* IAI39  
 585057 *Escherichia coli* IAI39  
 585057 *Escherichia coli* IAI39  
 585397 *Escherichia coli* ED1a  
 585397 *Escherichia coli* ED1a

Table S3 - refG-proph Interact

**metagenomic samples and the phage taxa that were identified as integrated p**

| <b>Predicted prophage region (taxid.projid.locu_start_st mrkr POG Vir_taxid</b> |         |         |
|---------------------------------------------------------------------------------|---------|---------|
| 1040964.67955.NZ_AFOJ01000007_330416_376982                                     | POG0252 | 35237   |
| 198214.62907.NC_004337_2030765_2095753                                          | POG3328 | 186777  |
| 198215.57991.NC_004741_2007446_2067068                                          | POG3328 | 186777  |
| 209261.57973.NC_004631_3501128_3545727                                          | POG0571 | 140410  |
| 220341.57793.NC_003198_3494786_3560068                                          | POG0571 | 140410  |
| 272620.57619.NC_009648_3798567_3834957                                          | POG0571 | 140410  |
| 300269.58217.NC_007384_2884693_2916444                                          | POG3328 | 186777  |
| 331112.58393.NC_009800_450152_460516                                            | POG0302 | 186794  |
| 331112.58393.NC_009800_917273_967024                                            | POG0571 | 140410  |
| 340197.54299.NZ_AAJU02000016_1027_37997                                         | POG1924 | 686598  |
| 344610.54321.NZ_AAKB02000001_1834929_1875213                                    | POG0571 | 140410  |
| 349123.54165.NZ_AAPZ02000001_397013_461160                                      | POG0252 | 35237   |
| 364106.58541.NC_007946_1241467_1305787                                          | POG0571 | 140410  |
| 364106.58541.NC_007946_2906465_2962748                                          | POG0302 | 186794  |
| 409438.59425.NC_011415_1475428_1526058                                          | POG0252 | 35237   |
| 411460.54511.NZ_AAVP02000011_32895_83826                                        | POG0252 | 35237   |
| 411461.54513.NZ_AAXA02000011_114374_187343                                      | POG0256 | 686602  |
| 411464.54519.NZ_ABXU01000024_858_36831                                          | POG0573 | 10662   |
| 411464.54519.NZ_ABXU01000033_1_12915                                            | POG0030 | 10744   |
| 411464.54519.NZ_ABXU01000046_1_10055                                            | POG2211 | 1196844 |
| 411477.54545.NZ_AAXE02000102_311200_382618                                      | POG0252 | 35237   |
| 411902.54523.NZ_ABCC02000042_4448_65969                                         | POG0252 | 35237   |
| 411903.54525.NZ_AAVN02000001_262289_309092                                      | POG0252 | 35237   |
| 413997.58803.NC_012967_2100409_2143776                                          | POG0573 | 10662   |
| 428125.54605.NZ_ABCB02000018_181402_233637                                      | POG1111 | 196894  |
| 428125.54605.NZ_ABCB02000021_273840_337832                                      | POG2793 | 186777  |
| 435591.58301.NC_009615_995121_1045804                                           | POG0252 | 35237   |
| 445972.54807.NZ_ABGD02000014_1027_105003                                        | POG0210 | 28883   |
| 445972.54807.NZ_ABGD02000019_90436_128029                                       | POG2793 | 186777  |
| 457412.55629.NZ_GG696046_272439_338857                                          | POG0252 | 35237   |
| 457421.55287.NZ_DS990260_1575043_1608234                                        | POG2211 | 1196844 |
| 469591.50765.NZ_GG774987_780370_801902                                          | POG0252 | 35237   |
| 469598.55601.NZ_DS999460_731989_788925                                          | POG3328 | 186777  |
| 469598.55601.NZ_DS999462_509895_552140                                          | POG0302 | 186794  |
| 469610.51545.NZ_GL383997_105407_169431                                          | POG1917 | 686598  |
| 469610.51545.NZ_GL383997_40963_88345                                            | POG0030 | 10744   |
| 568816.74445.NC_016077_1331206_1431157                                          | POG0252 | 35237   |
| 573235.41021.NC_013361_2667387_2714788                                          | POG0571 | 140410  |
| 585034.59377.NC_011741_2711042_2765231                                          | POG1924 | 686598  |
| 585035.62979.NC_011742_2493355_2534529                                          | POG0302 | 186794  |
| 585035.62979.NC_011742_2798408_2895086                                          | POG2793 | 186777  |
| 585054.59375.NC_011740_2752630_2795009                                          | POG0573 | 10662   |
| 585057.59381.NC_011750_1882552_1904933                                          | POG0571 | 140410  |
| 585057.59381.NC_011750_1921935_2090060                                          | POG0573 | 10662   |
| 585057.59381.NC_011750_2735610_2796274                                          | POG0030 | 10744   |
| 585397.59379.NC_011745_2381497_2402869                                          | POG0573 | 10662   |
| 585397.59379.NC_011745_3016220_3070726                                          | POG0571 | 140410  |

Table S3 - refG-proph Interact

**rophages**

| <b>Vir_descrip</b>          | <b>Vir_rank</b> |
|-----------------------------|-----------------|
| dsDNA viruses, no RNA stage | no rank         |
| Mu-like viruses             | genus           |
| Mu-like viruses             | genus           |
| P2-like viruses             | genus           |
| P2-like viruses             | genus           |
| P2-like viruses             | genus           |
| Mu-like viruses             | genus           |
| P22-like viruses            | genus           |
| P2-like viruses             | genus           |
| unassigned Myoviridae       | no rank         |
| P2-like viruses             | genus           |
| dsDNA viruses, no RNA stage | no rank         |
| P2-like viruses             | genus           |
| P22-like viruses            | genus           |
| dsDNA viruses, no RNA stage | no rank         |
| dsDNA viruses, no RNA stage | no rank         |
| unassigned Podoviridae      | no rank         |
| Myoviridae                  | family          |
| Podoviridae                 | family          |
| Hp1likevirus                | genus           |
| dsDNA viruses, no RNA stage | no rank         |
| dsDNA viruses, no RNA stage | no rank         |
| dsDNA viruses, no RNA stage | no rank         |
| Myoviridae                  | family          |
| unclassified Siphoviridae   | no rank         |
| Mu-like viruses             | genus           |
| dsDNA viruses, no RNA stage | no rank         |
| Caudovirales                | order           |
| Mu-like viruses             | genus           |
| dsDNA viruses, no RNA stage | no rank         |
| Hp1likevirus                | genus           |
| dsDNA viruses, no RNA stage | no rank         |
| Mu-like viruses             | genus           |
| P22-like viruses            | genus           |
| unassigned Myoviridae       | no rank         |
| Podoviridae                 | family          |
| dsDNA viruses, no RNA stage | no rank         |
| P2-like viruses             | genus           |
| unassigned Myoviridae       | no rank         |
| P22-like viruses            | genus           |
| Mu-like viruses             | genus           |
| Myoviridae                  | family          |
| P2-like viruses             | genus           |
| Myoviridae                  | family          |
| Podoviridae                 | family          |
| Myoviridae                  | family          |
| P2-like viruses             | genus           |





|                     |            |     |     |
|---------------------|------------|-----|-----|
| JCVI_SMPL_GS108a    | metagenome | 0.1 | 0.8 |
| JCVI_SMPL_GS108b    | metagenome | 0.8 | 3   |
| JCVI_SMPL_GS109     | metagenome | 0.1 | 0.8 |
| JCVI_SMPL_GS110a    | metagenome | 0.1 | 0.8 |
| JCVI_SMPL_GS110b    | metagenome | 0.8 | 3   |
| JCVI_SMPL_GS111     | metagenome | 0.1 | 0.8 |
| JCVI_SMPL_GS112a    | metagenome | 0.1 | 0.8 |
| JCVI_SMPL_GS112b    | metagenome | 0.8 | 3   |
| JCVI_SMPL_GS113     | metagenome | 0.1 | 0.8 |
| JCVI_SMPL_GS113     | metagenome | 0.1 | 0.8 |
| JCVI_SMPL_GS114     | metagenome | 0.1 | 0.8 |
| JCVI_SMPL_GS114     | metagenome | 0.1 | 0.8 |
| JCVI_SMPL_GS114     | metagenome | 0.1 | 0.8 |
| JCVI_SMPL_GS115     | metagenome | 0.1 | 0.8 |
| JCVI_SMPL_GS116     | metagenome | 0.1 | 0.8 |
| JCVI_SMPL_GS117a    | metagenome | 0.1 | 0.8 |
| JCVI_SMPL_GS117b    | metagenome | 0.8 | 3   |
| JCVI_SMPL_GS119     | metagenome | 0.1 | 0.8 |
| JCVI_SMPL_GS120     | metagenome | 0.1 | 0.8 |
| JCVI_SMPL_GS121     | metagenome | 0.1 | 0.8 |
| JCVI_SMPL_GS122a    | metagenome | 0.1 | 0.8 |
| JCVI_SMPL_GS122a    | metagenome | 0.1 | 0.8 |
| JCVI_SMPL_GS122b    | metagenome | 0.8 | 3   |
| JCVI_SMPL_GS123     | metagenome | 0.1 | 0.8 |
| JCVI_SMPL_GS148     | metagenome | 0.1 | 0.8 |
| JCVI_SMPL_GS148     | metagenome | 0.1 | 0.8 |
| JCVI_SMPL_GS149     | metagenome | 0.1 | 0.8 |
| JCVI_SMPL_GS149     | metagenome | 0.1 | 0.8 |
| cam_pseodu_sample_1 | metagenome |     |     |

**A and analyzed**

| <b>SAMPLE_DESCRIPTION</b>           | <b>SAMPLE_NAME</b> |
|-------------------------------------|--------------------|
| GS108                               | GS108              |
| GS112                               | GS112              |
| GS000a - Sargasso Stations 11 & 13  | GS000a             |
| GS000a - Sargasso Stations 11 & 13  | GS000a             |
| GS000a - Sargasso Stations 11 & 13  | GS000a             |
| GS000a - Sargasso Stations 11 & 13  | GS000a             |
| GS000a - Sargasso Stations 11 & 13  | GS000a             |
| GS000a - Sargasso Stations 11 & 13  | GS000a             |
| GS000a - Sargasso Stations 11 & 13  | GS000a             |
| GS000a - Sargasso Stations 11 & 13  | GS000a             |
| GS000a - Sargasso Stations 11 & 13  | GS000a             |
| GS000a - Sargasso Stations 11 & 13  | GS000a             |
| GS000a - Sargasso Stations 11 & 13  | GS000a             |
| GS000a - Sargasso Stations 11 & 13  | GS000a             |
| GS000b - Sargasso Stations 11 & 13  | GS000b             |
| GS000b - Sargasso Stations 11 & 13  | GS000b             |
| GS000b - Sargasso Stations 11 & 13  | GS000b             |
| GS000b - Sargasso Stations 11 & 13  | GS000b             |
| GS000b - Sargasso Stations 11 & 13  | GS000b             |
| GS000b - Sargasso Stations 11 & 13  | GS000b             |
| GS000b - Sargasso Stations 11 & 13  | GS000b             |
| GS000b - Sargasso Stations 11 & 13  | GS000b             |
| GS000b - Sargasso Stations 11 & 13  | GS000b             |
| GS000b - Sargasso Stations 11 & 13  | GS000b             |
| GS000b - Sargasso Stations 11 & 13  | GS000b             |
| GS000b - Sargasso Stations 11 & 13  | GS000b             |
| GS000b - Sargasso Stations 11 & 13  | GS000b             |
| GS000b - Sargasso Stations 11 & 13  | GS000b             |
| GS000b - Sargasso Stations 11 & 13  | GS000b             |
| GS000c - Sargasso Station 3         | GS000c             |
| GS000c - Sargasso Station 3         | GS000c             |
| GS000c - Sargasso Station 3         | GS000c             |
| GS000d - Sargasso Station 13        | GS000d             |
| GS000d - Sargasso Station 13        | GS000d             |
| GS000d - Sargasso Station 13        | GS000d             |
| GS000d - Sargasso Station 13        | GS000d             |
| GS000d - Sargasso Station 13        | GS000d             |
| GS000d - Sargasso Station 13        | GS000d             |
| GS001a - Hydrostation S             | GS001a             |
| GS001a - Hydrostation S             | GS001a             |
| GS001b - Hydrostation S             | GS001b             |
| GS001c - Hydrostation S             | GS001c             |
| GS002 - Gulf of Maine               | GS002              |
| GS003 - Browns Bank Gulf of Maine   | GS003              |
| GS004 - Outside Halifax Nova Scotia | GS004              |
| GS005 - Bedford Basin Nova Scotia   | GS005              |
| GS006 - Bay of Fundy Nova Scotia    | GS006              |
| GS007 - Northern Gulf of Maine      | GS007              |
| GS008 - Newport Harbor RI           | GS008              |
| GS009 - Block Island NY             | GS009              |
| GS010 - Cape May NJ                 | GS010              |
| GS011 - Delaware Bay NJ             | GS011              |
| GS012 - Chesapeake Bay MD           | GS012              |

|                                                              |         |
|--------------------------------------------------------------|---------|
| GS012 - Chesapeake Bay MD                                    | GS012   |
| GS013 - Off Nags Head NC                                     | GS013   |
| GS014 - South of Charleston SC                               | GS014   |
| GS015 - Off Key West FL                                      | GS015   |
| GS016 - Gulf of Mexico                                       | GS016   |
| GS017 - Yucatan Channel                                      | GS017   |
| GS018 - Rosario Bank                                         | GS018   |
| GS019 - Northeast of Colon                                   | GS019   |
| GS020 - Lake Gatun                                           | GS020   |
| GS021 - Gulf of Panama                                       | GS021   |
| GS022 - 250 miles from Panama City                           | GS022   |
| GS023 - 30 miles from Cocos Island                           | GS023   |
| GS025 - Dirty Rock Cocos Island                              | GS025   |
| GS026 - 134 miles NE of Galapagos                            | GS026   |
| GS026 - 134 miles NE of Galapagos                            | GS026   |
| GS027 - Devil's Crown Floreana Island                        | GS027   |
| GS028 - Coastal Floreana                                     | GS028   |
| GS029 - North James Bay Santiago Island                      | GS029   |
| GS030 - Warm seep Roca Redonda                               | GS030   |
| GS030 - Warm seep Roca Redonda                               | GS030   |
| GS031 - Upwelling Fernandina Island                          | GS031   |
| GS032 - Mangrove on Isabella Island                          | GS032   |
| GS032 - Mangrove on Isabella Island                          | GS032   |
| GS033 - Punta Cormorant Floreana Island (Hypersaline Lagoon) | GS033   |
| GS034 - North Seamore Island                                 | GS034   |
| GS035 - Wolf Island                                          | GS035   |
| GS036 - Cabo Marshall Isabella Island                        | GS036   |
| GS037 - Equatorial Pacific TAO Buoy                          | GS037   |
| GS038 - Tropical South Pacific                               | GS038   |
| GS039 - Tropical South Pacific                               | GS039   |
| GS040 - Tropical South Pacific                               | GS040   |
| GS041 - Tropical South Pacific                               | GS041   |
| GS042 - Tropical South Pacific                               | GS042   |
| GS043 - Tropical South Pacific                               | GS043   |
| GS044 - 600 miles from F. Polynesia                          | GS044   |
| GS045 - 400 miles from F. Polynesia                          | GS045   |
| GS046 - 300 miles from F. Polynesia                          | GS046   |
| GS047 - 201 miles from F. Polynesia                          | GS047   |
| GS048a - Moorea Cooks Bay                                    | GS048a  |
| GS049 - Moorea Outside Cooks Bay                             | GS049   |
| GS050 - Tikehau Lagoon                                       | GS050   |
| GS051 - Rangirora Atoll                                      | GS051   |
| MOVE858 - Chesapeake Bay MD                                  | MOVE858 |
| MOVE858 - Chesapeake Bay MD                                  | MOVE858 |
| MOVE858 - Chesapeake Bay MD                                  | MOVE858 |
| MOVE858 - Chesapeake Bay MD                                  | MOVE858 |
| MOVE858 - Chesapeake Bay MD                                  | MOVE858 |
| MOVE858 - Chesapeake Bay MD                                  | MOVE858 |
| MOVE858 - Chesapeake Bay MD                                  | MOVE858 |
| MOVE858 - Chesapeake Bay MD                                  | MOVE858 |
| GS048b - Inside Cook's Bay Moorea French Polynesia           | GS048b  |

|                                                                |                           |        |
|----------------------------------------------------------------|---------------------------|--------|
| GS108a - Cocos Keeling                                         | Inside Lagoon             | GS108a |
| GS108b - Cocos Keeling                                         | Inside Lagoon             | GS108b |
| GS109 - Indian Ocean                                           |                           | GS109  |
| GS110a - Indian Ocean                                          |                           | GS110a |
| GS110b - Indian Ocean                                          |                           | GS110b |
| GS111 - Indian Ocean                                           |                           | GS111  |
| GS112a - Indian Ocean                                          |                           | GS112a |
| GS112b - Indian Ocean                                          |                           | GS112b |
| GS113 - Indian Ocean                                           |                           | GS113  |
| GS113 - Indian Ocean                                           |                           | GS113  |
| GS114 - 500 Miles west of the Seychelles in the Indian Ocean   |                           | GS114  |
| GS114 - 500 Miles west of the Seychelles in the Indian Ocean   |                           | GS114  |
| GS114 - 500 Miles west of the Seychelles in the Indian Ocean   |                           | GS114  |
| GS115 - Indian Ocean                                           |                           | GS115  |
| GS116 - Outside Seychelles                                     | Indian Ocean              | GS116  |
| GS117a - St. Anne Island                                       | Seychelles                | GS117a |
| GS117b - St. Anne Island                                       | Seychelles                | GS117b |
| GS119 - International Water                                    | Outside of Reunion Island | GS119  |
| GS120 - Madagascar Waters                                      |                           | GS120  |
| GS121 - International water between Madagascar and South Afric |                           | GS121  |
| GS122a - International waters between Madagascar and South Af  |                           | GS122a |
| GS122a - International waters between Madagascar and South Af  |                           | GS122a |
| GS122b - International waters between Madagascar and South Af  |                           | GS122b |
| GS123 - International water between Madagascar and South Afric |                           | GS123  |
| GS148 - East coast Zanzibar (Tanzania)                         | offshore Paje lagoon      | GS148  |
| GS148 - East coast Zanzibar (Tanzania)                         | offshore Paje lagoon      | GS148  |
| GS149 - West coast Zanzibar (Tanzania)                         | harbour region            | GS149  |
| GS149 - West coast Zanzibar (Tanzania)                         | harbour region            | GS149  |

Pseodo sample for the

| MATERIAL_ACC        | SITE_NAME                   | LATITUDE   |
|---------------------|-----------------------------|------------|
| CAM_BM_GS108        | GS108                       | -12.092617 |
| CAM_BM_GS112        | GS112                       | -8.50525   |
| JCVI_SITE_GS000_S13 | Sargasso Station 13         | 31.175     |
| JCVI_SITE_GS000_S11 | Sargasso Station 11         | 31.175     |
| JCVI_SITE_GS000_S11 | Sargasso Station 11         | 31.175     |
| JCVI_SITE_GS000_S11 | Sargasso Station 11         | 31.175     |
| JCVI_SITE_GS000_S11 | Sargasso Station 11         | 31.175     |
| JCVI_SITE_GS000_S13 | Sargasso Station 13         | 31.175     |
| JCVI_SITE_GS000_S11 | Sargasso Station 11         | 31.175     |
| JCVI_SITE_GS000_S13 | Sargasso Station 13         | 31.175     |
| JCVI_SITE_GS000_S13 | Sargasso Station 13         | 31.175     |
| JCVI_SITE_GS000_S13 | Sargasso Station 13         | 31.175     |
| JCVI_SITE_GS000_S13 | Sargasso Station 13         | 31.175     |
| JCVI_SITE_GS000_S11 | Sargasso Station 11         | 31.175     |
| JCVI_SITE_GS000_S11 | Sargasso Station 11         | 31.175     |
| JCVI_SITE_GS000_S11 | Sargasso Station 11         | 31.175     |
| JCVI_SITE_GS000_S11 | Sargasso Station 11         | 31.175     |
| JCVI_SITE_GS000_S11 | Sargasso Station 11         | 31.175     |
| JCVI_SITE_GS000_S11 | Sargasso Station 11         | 31.175     |
| JCVI_SITE_GS000_S13 | Sargasso Station 13         | 31.175     |
| JCVI_SITE_GS000_S13 | Sargasso Station 13         | 31.175     |
| JCVI_SITE_GS000_S13 | Sargasso Station 13         | 31.175     |
| JCVI_SITE_GS000_S13 | Sargasso Station 13         | 31.175     |
| JCVI_SITE_GS000_S11 | Sargasso Station 11         | 31.175     |
| JCVI_SITE_GS000_S13 | Sargasso Station 13         | 31.175     |
| JCVI_SITE_GS000_S13 | Sargasso Station 13         | 31.175     |
| JCVI_SITE_GS000_S03 | Sargasso Stations 3         | 32.174835  |
| JCVI_SITE_GS000_S03 | Sargasso Stations 3         | 32.174835  |
| JCVI_SITE_GS000_S03 | Sargasso Stations 3         | 32.174835  |
| JCVI_SITE_GS000_S13 | Sargasso Station 13         | 31.175     |
| JCVI_SITE_GS000_S13 | Sargasso Station 13         | 31.175     |
| JCVI_SITE_GS000_S13 | Sargasso Station 13         | 31.175     |
| JCVI_SITE_GS000_S13 | Sargasso Station 13         | 31.175     |
| JCVI_SITE_GS000_S13 | Sargasso Station 13         | 31.175     |
| JCVI_SITE_GS001     | Hydrostation S              | 32.166668  |
| JCVI_SITE_GS002     | Gulf of Maine               | 42.503056  |
| JCVI_SITE_GS003     | Browns Bank Gulf of Maine   | 42.85278   |
| JCVI_SITE_GS004     | Outside Halifax Nova Scotia | 44.137222  |
| JCVI_SITE_GS005     | Bedford Basin Nova Scotia   | 44.690277  |
| JCVI_SITE_GS006     | Bay of Fundy Nova Scotia    | 45.111668  |
| JCVI_SITE_GS007     | Northern Gulf of Maine      | 43.63222   |
| JCVI_SITE_GS008     | Newport Harbor RI           | 41.485832  |
| JCVI_SITE_GS009     | Block Island NY             | 41.09111   |
| JCVI_SITE_GS010     | Cape May NJ                 | 38.94      |
| JCVI_SITE_GS011     | Delaware Bay NJ             | 39.417778  |
| JCVI_SITE_GS012     | Chesapeake Bay MD           | 38.946945  |

|                   |                                                   |              |
|-------------------|---------------------------------------------------|--------------|
| JCVI_SITE_GS012   | Chesapeake Bay MD                                 | 38.946945    |
| JCVI_SITE_GS013   | Off Nags Head NC                                  | 36.003887    |
| JCVI_SITE_GS014   | South of Charleston SC                            | 32.506943    |
| JCVI_SITE_GS015   | Off Key West FL                                   | 24.488333    |
| JCVI_SITE_GS016   | Gulf of Mexico                                    | 24.174723    |
| JCVI_SITE_GS017   | Yucatan Channel                                   | 20.5225      |
| JCVI_SITE_GS018   | Rosario Bank                                      | 18.036667    |
| JCVI_SITE_GS019   | Northeast of Colon                                | 10.716389    |
| JCVI_SITE_GS020   | Lake Gatun                                        | 9.164444     |
| JCVI_SITE_GS021   | Gulf of Panama                                    | 8.129167     |
| JCVI_SITE_GS022   | 250 miles from Panama City                        | 6.492778     |
| JCVI_SITE_GS023   | 30 miles from Cocos Island                        | 5.64         |
| JCVI_SITE_GS025   | Dirty Rock Cocos Island                           | 5.552778     |
| JCVI_SITE_GS026   | 134 miles NE of Galapagos                         | 1.2641667    |
| JCVI_SITE_GS026   | 134 miles NE of Galapagos                         | 1.2641667    |
| JCVI_SITE_GS027   | Devil's Crown Floreana Island                     | -1.2161111   |
| JCVI_SITE_GS028   | Coastal Floreana                                  | -1.2169445   |
| JCVI_SITE_GS029   | North James Bay Santiago Island                   | -0.2         |
| JCVI_SITE_GS030   | Warm seep Roca Redonda                            | 0.27222222   |
| JCVI_SITE_GS030   | Warm seep Roca Redonda                            | 0.27222222   |
| JCVI_SITE_GS031   | Upwelling Fernandina Island                       | -0.3011111   |
| JCVI_SITE_GS032   | Mangrove on Isabella Island                       | -0.5938889   |
| JCVI_SITE_GS032   | Mangrove on Isabella Island                       | -0.5938889   |
| JCVI_SITE_GS033   | Punta Cormorant Hypersaline Lagoon Floreana Islan | -1.2283334   |
| JCVI_SITE_GS034   | North Seamore Island                              | -0.38305557  |
| JCVI_SITE_GS035   | Wolf Island                                       | 1.3891667    |
| JCVI_SITE_GS036   | Cabo Marshall Isabella Island                     | -0.020833334 |
| JCVI_SITE_GS037   | Equatorial Pacific TAO Buoy                       | -1.9738889   |
| JCVI_SITE_GS038   | Tropical South Pacific                            | -2.5819445   |
| JCVI_SITE_GS039   | Tropical South Pacific                            | -3.3433332   |
| JCVI_SITE_GS040   | Tropical South Pacific                            | -4.498889    |
| JCVI_SITE_GS041   | Tropical South Pacific                            | -5.93        |
| JCVI_SITE_GS042   | Tropical South Pacific                            | -7.1075      |
| JCVI_SITE_GS043   | Tropical South Pacific                            | -7.661111    |
| JCVI_SITE_GS044   | 600 miles from F. Polynesia                       | -8.415       |
| JCVI_SITE_GS045   | 400 miles from F. Polynesia                       | -9.0175      |
| JCVI_SITE_GS046   | 300 miles from F. Polynesia                       | -9.571111    |
| JCVI_SITE_GS047   | 201 miles from F. Polynesia                       | -10.131389   |
| JCVI_SITE_GS048   | Moorea Cooks Bay                                  | -17.475834   |
| JCVI_SITE_GS049   | Moorea Outside Cooks Bay                          | -17.453056   |
| JCVI_SITE_GS050   | Tikehau Lagoon                                    | -15.277778   |
| JCVI_SITE_GS051   | Rangiroa Atoll                                    | -15.143611   |
| JCVI_SITE_MOVE858 | Chesapeake Bay MD                                 | 38.133335    |
| JCVI_SITE_MOVE858 | Chesapeake Bay MD                                 | 38.133335    |
| JCVI_SITE_MOVE858 | Chesapeake Bay MD                                 | 38.133335    |
| JCVI_SITE_MOVE858 | Chesapeake Bay MD                                 | 38.133335    |
| JCVI_SITE_MOVE858 | Chesapeake Bay MD                                 | 38.133335    |
| JCVI_SITE_MOVE858 | Chesapeake Bay MD                                 | 38.133335    |
| JCVI_SITE_MOVE858 | Chesapeake Bay MD                                 | 38.133335    |
| JCVI_SITE_MOVE858 | Chesapeake Bay MD                                 | 38.133335    |
| JCVI_SITE_MOVE858 | Chesapeake Bay MD                                 | 38.133335    |
| JCVI_SITE_GS048   | Moorea Cooks Bay                                  | -17.475834   |

|                          |                                  |                                     |            |
|--------------------------|----------------------------------|-------------------------------------|------------|
| JCVI_SITE_GS108          | Cocos Keeling                    | Inside Lagoon                       | -12.0925   |
| JCVI_SITE_GS108          | Cocos Keeling                    | Inside Lagoon                       | -12.0925   |
| JCVI_SITE_GS109          | Indian Ocean                     |                                     | -10.943611 |
| JCVI_SITE_GS110          | Indian Ocean                     |                                     | -10.446111 |
| JCVI_SITE_GS110          | Indian Ocean                     |                                     | -10.446111 |
| JCVI_SITE_GS111          | Indian Ocean                     |                                     | -9.596945  |
| JCVI_SITE_GS112          | Indian Ocean                     |                                     | -8.505     |
| JCVI_SITE_GS112          | Indian Ocean                     |                                     | -8.505     |
| JCVI_SITE_GS113          | Indian Ocean                     |                                     | -7.0075    |
| JCVI_SITE_GS113          | Indian Ocean                     |                                     | -7.0075    |
| JCVI_SITE_GS114          | 500 Miles west of the Seychelles | in the Indian Ocean                 | -4.990278  |
| JCVI_SITE_GS114          | 500 Miles west of the Seychelles | in the Indian Ocean                 | -4.990278  |
| JCVI_SITE_GS114          | 500 Miles west of the Seychelles | in the Indian Ocean                 | -4.990278  |
| JCVI_SITE_GS115          | Indian Ocean                     |                                     | -4.6625    |
| JCVI_SITE_GS116          | Outside Seychelles               | Indian Ocean                        | -4.635     |
| JCVI_SITE_GS117          | St. Anne Island                  | Seychelles                          | -4.613611  |
| JCVI_SITE_GS117          | St. Anne Island                  | Seychelles                          | -4.613611  |
| JCVI_SITE_GS119          | International Water              | Outside of Reunion Island           | -23.21611  |
| JCVI_SITE_GS120          | Madagascar Waters                |                                     | -26.035    |
| JCVI_SITE_GS121          | International water              | between Madagascar and South Africa | -29.348888 |
| JCVI_SITE_GS122          | International waters             | between Madagascar and South Africa | -30.898333 |
| JCVI_SITE_GS122          | International waters             | between Madagascar and South Africa | -30.898333 |
| JCVI_SITE_GS122          | International waters             | between Madagascar and South Africa | -30.898333 |
| JCVI_SITE_GS123          | International water              | between Madagascar and South Africa | -32.399166 |
| JCVI_SITE_GS148          | East coast Zanzibar (Tanzania)   | offshore Paje lagoon                | -6.3166666 |
| JCVI_SITE_GS148          | East coast Zanzibar (Tanzania)   | offshore Paje lagoon                | -6.3166666 |
| JCVI_SITE_GS149          | West coast Zanzibar (Tanzania)   | harbour region                      | -6.116667  |
| JCVI_SITE_GS149          | West coast Zanzibar (Tanzania)   | harbour region                      | -6.116667  |
| cam_pseodu_biomaterial_1 |                                  |                                     |            |



|             |                      |                  |
|-------------|----------------------|------------------|
| -76.41722   | 13.2 Estuary         | UNITED STATES    |
| -75.39472   | 2.1 Coastal          | UNITED STATES    |
| -79.263885  | 1 Coastal            | UNITED STATES    |
| -83.07      | 1.7 Coastal          | UNITED STATES    |
| -84.344444  | 2 Coastal Sea        | UNITED STATES    |
| -85.41361   | 2 Open Ocean         | MEXICO           |
| -83.78472   | 1.7 Open Ocean       | HONDURAS         |
| -80.25445   | 1.7 Coastal          | PANAMA           |
| -79.83611   | 2 Fresh Water        | PANAMA           |
| -79.69111   | 1.6 Coastal          | PANAMA           |
| -82.90389   | 2 Open Ocean         | PANAMA           |
| -86.56528   | 2 Open Ocean         | COSTA RICA       |
| -87.087776  | 1.1 Fringing Reef    | COSTA RICA       |
| -90.295     | 2 Open Ocean         | ECUADOR          |
| -90.295     | 2 Open Ocean         | ECUADOR          |
| -90.422775  | 2.2 Coastal          | ECUADOR          |
| -90.319725  | 2 Coastal            | ECUADOR          |
| -90.83528   | 2.1 Coastal          | ECUADOR          |
| -91.63333   | 19 Warm Seep         | ECUADOR          |
| -91.63333   | 19 Warm Seep         | ECUADOR          |
| -91.651665  | 12 Coastal upwelling | ECUADOR          |
| -91.06944   | 0.1 Mangrove         | ECUADOR          |
| -91.06944   | 0.1 Mangrove         | ECUADOR          |
| -90.42917   | 0.2 Hypersaline      | ECUADOR          |
| -90.279724  | 2.1 Coastal          | ECUADOR          |
| -91.81695   | 1.7 Coastal          | ECUADOR          |
| -91.19778   | 2.1 Coastal          | ECUADOR          |
| -95.014725  | 1.8 Open Ocean       | INTERNATIONAL    |
| -97.85139   | 1.8 Open Ocean       | INTERNATIONAL    |
| -101.373886 | 2 Open Ocean         | INTERNATIONAL    |
| -105.07     | 2.2 Open Ocean       | INTERNATIONAL    |
| -108.68694  | 2 Open Ocean         | INTERNATIONAL    |
| -116.11916  | 1.7 Open Ocean       | INTERNATIONAL    |
| -120.40222  | 1.9 Open Ocean       | INTERNATIONAL    |
| -124.23972  | 2 Open Ocean         | INTERNATIONAL    |
| -127.76722  | 1.7 Open Ocean       | INTERNATIONAL    |
| -131.49167  | 1.9 Open Ocean       | INTERNATIONAL    |
| -135.44945  | 30 Open Ocean        | FRENCH POLYNESIA |
| -149.81223  | 1.4 Coral Reef       | FRENCH POLYNESIA |
| -149.79889  | 1.4 Coastal          | FRENCH POLYNESIA |
| -148.22444  | 1.2 Coral Atoll      | FRENCH POLYNESIA |
| -147.435    | 1 Coral Reef Atoll   | FRENCH POLYNESIA |
| -76.38333   | 2.07 Estuary         | UNITED STATES    |
| -76.38333   | 2.07 Estuary         | UNITED STATES    |
| -76.38333   | 2.07 Estuary         | UNITED STATES    |
| -76.38333   | 2.07 Estuary         | UNITED STATES    |
| -76.38333   | 2.07 Estuary         | UNITED STATES    |
| -76.38333   | 2.07 Estuary         | UNITED STATES    |
| -76.38333   | 2.07 Estuary         | UNITED STATES    |
| -76.38333   | 2.07 Estuary         | UNITED STATES    |
| -149.81223  | 1.4 Coral Reef       | FRENCH POLYNESIA |

|           |                    |                             |
|-----------|--------------------|-----------------------------|
| 96.88167  | 1.8 Lagoon Reef    | AUSTRALIA                   |
| 96.88167  | 1.8 Lagoon Reef    | AUSTRALIA                   |
| 92.05889  | 1.5 Open Ocean     | INTERNATIONAL               |
| 88.30278  | 1.5 Open Ocean     | INTERNATIONAL               |
| 88.30278  | 1.5 Open Ocean     | INTERNATIONAL               |
| 84.1975   | 1.8 Open Ocean     | INTERNATIONAL               |
| 80.37556  | 1.8 Open Ocean     | INTERNATIONAL               |
| 80.37556  | 1.8 Open Ocean     | INTERNATIONAL               |
| 76.33139  | 1.8 Open Ocean     | INTERNATIONAL               |
| 76.33139  | 1.8 Open Ocean     | INTERNATIONAL               |
| 64.97667  | 1.5 Open Ocean     | INTERNATIONAL               |
| 64.97667  | 1.5 Open Ocean     | INTERNATIONAL               |
| 64.97667  | 1.5 Open Ocean     | INTERNATIONAL               |
| 60.523056 | 1.5 Open Ocean     | INTERNATIONAL               |
| 56.836113 | 1.5 Open Ocean     | SEYCHELLES                  |
| 55.50861  | 1.8 Coastal sample | SEYCHELLES                  |
| 55.50861  | 1.8 Coastal sample | SEYCHELLES                  |
| 52.30611  | 2 Open Ocean       | INTERNATIONAL               |
| 50.123055 | 2.8 Open Ocean     | MADAGASCAR                  |
| 43.215557 | 1.5 Open Ocean     | INTERNATIONAL               |
| 40.420277 | 1.9 Open Ocean     | INTERNATIONAL               |
| 40.420277 | 1.9 Open Ocean     | INTERNATIONAL               |
| 40.420277 | 1.9 Open Ocean     | INTERNATIONAL               |
| 36.591946 | 2.2 Open Ocean     | INTERNATIONAL               |
| 39.009167 | 0.3 Fringing Reef  | TANZANIA UNITED REPUBLIC OF |
| 39.009167 | 0.3 Fringing Reef  | TANZANIA UNITED REPUBLIC OF |
| 39.116665 | 1.5 Harbor         | TANZANIA UNITED REPUBLIC OF |
| 39.116665 | 1.5 Harbor         | TANZANIA UNITED REPUBLIC OF |

| REGION                    | HABITAT_NAME | LIBRARY_ACC                                         |
|---------------------------|--------------|-----------------------------------------------------|
| Coccos Keeling            | Inside Lago  | marine habitat CAM_LIB_GOS108XLRVAL-4F-1-400        |
| Indian Ocean              |              | marine habitat CAM_LIB_GOS112XLRVAL-4F-1-400        |
| Sargasso Sea              |              | saline water JCVI_LIB_GS-00a-01-01-9P0KB-T12947     |
| Sargasso Sea              |              | saline water JCVI_LIB_GS-00a-01-01-3P5KB-T12946     |
| Sargasso Sea              |              | saline water JCVI_LIB_GS-00a-01-01-10P0KB-T12948    |
| Sargasso Sea              |              | saline water JCVI_LIB_GS-00a-01-01-2P5KB-T13532     |
| Sargasso Sea              |              | saline water JCVI_LIB_GS-00a-01-01-2P0KB-T13512     |
| Sargasso Sea              |              | saline water JCVI_LIB_GS-00a-01-01-3P0KB-T12945     |
| Sargasso Sea              |              | saline water JCVI_LIB_GS-00a-01-01-3P0KB-T12945     |
| Sargasso Sea              |              | saline water JCVI_LIB_GS-00a-01-01-2P0KB-T13512     |
| Sargasso Sea              |              | saline water JCVI_LIB_GS-00a-01-01-2P5KB-T13532     |
| Sargasso Sea              |              | saline water JCVI_LIB_GS-00a-01-01-10P0KB-T12948    |
| Sargasso Sea              |              | saline water JCVI_LIB_GS-00a-01-01-3P5KB-T12946     |
| Sargasso Sea              |              | saline water JCVI_LIB_GS-00a-01-01-9P0KB-T12947     |
| Sargasso Sea              |              | saline water JCVI_LIB_GS-00b-01-01-9P0KB-T12888     |
| Sargasso Sea              |              | saline water JCVI_LIB_GS-00b-01-01-10P0KB-T12889    |
| Sargasso Sea              |              | saline water JCVI_LIB_GS-00b-01-01-1P6-2P0KB-T12889 |
| Sargasso Sea              |              | saline water JCVI_LIB_GS-00b-01-01-2P0-2P5KB-T13513 |
| Sargasso Sea              |              | saline water JCVI_LIB_GS-00b-01-01-3P0-4P0KB-T12889 |
| Sargasso Sea              |              | saline water JCVI_LIB_GS-00b-01-01-9P0KB-T12888     |
| Sargasso Sea              |              | saline water JCVI_LIB_GS-00b-01-01-10P0KB-T13513    |
| Sargasso Sea              |              | saline water JCVI_LIB_GS-00b-01-01-10P0KB-T12889    |
| Sargasso Sea              |              | saline water JCVI_LIB_GS-00b-01-01-1P6-2P0KB-T12889 |
| Sargasso Sea              |              | saline water JCVI_LIB_GS-00b-01-01-10P0KB-T13513    |
| Sargasso Sea              |              | saline water JCVI_LIB_GS-00b-01-01-3P0-4P0KB-T12889 |
| Sargasso Sea              |              | saline water JCVI_LIB_GS-00b-01-01-2P0-2P5KB-T13513 |
| Sargasso Sea              |              | saline water JCVI_LIB_GS-00c-01-01-9P0KB-T13751     |
| Sargasso Sea              |              | saline water JCVI_LIB_GS-00c-01-01-3P5KB-T13750     |
| Sargasso Sea              |              | saline water JCVI_LIB_GS-00c-01-01-10P0KB-T13752    |
| Sargasso Sea              |              | saline water JCVI_LIB_GS-00d-01-01-9P0KB-T13756     |
| Sargasso Sea              |              | saline water JCVI_LIB_GS-00d-01-01-2P0KB-T13753     |
| Sargasso Sea              |              | saline water JCVI_LIB_GS-00d-01-01-2P5KB-T13754     |
| Sargasso Sea              |              | saline water JCVI_LIB_GS-00d-01-01-10P0KB-T13757    |
| Sargasso Sea              |              | saline water JCVI_LIB_GS-00d-01-01-3P5KB-T13755     |
| Sargasso Sea              |              | saline water JCVI_LIB_GS-01a-01-01-6P0KB-T13985     |
| Sargasso Sea              |              | saline water JCVI_LIB_GS-01a-01-01-2P0KB-T13984     |
| Sargasso Sea              |              | saline water JCVI_LIB_GS-01b-01-01-2P0-4P0KB-T13984 |
| Sargasso Sea              |              | saline water JCVI_LIB_GS-01c-01-01-3P0KB-T13940     |
| North American East Coast |              | saline water JCVI_LIB_GS-02-01-01-1P6KB             |
| North American East Coast |              | saline water JCVI_LIB_GS-03-01-01-2P2KB             |
| North American East Coast |              | saline water JCVI_LIB_GS-04-01-01-1P4-1P8KB         |
| North American East Coast |              | saline water JCVI_LIB_GS-05-01-01-1P6KB             |
| North American East Coast |              | saline water JCVI_LIB_GS-06-01-01-1P8KB             |
| North American East Coast |              | saline water JCVI_LIB_GS-07-01-01-1P6KB             |
| North American East Coast |              | saline water JCVI_LIB_GS-08-01-01-1P6KB             |
| North American East Coast |              | saline water JCVI_LIB_GS-09-01-01-1P2-1P4KB         |
| North American East Coast |              | saline water JCVI_LIB_GS-10-01-01-1P5KB             |
| North American East Coast |              | saline water JCVI_LIB_GS-11-01-01-1P3-1P8KB         |
| North American East Coast |              | saline water JCVI_LIB_GS-12-01-01-1P3-1P6KB         |

|                           |                    |                                |
|---------------------------|--------------------|--------------------------------|
| North American East Coast | saline water       | JCVI_LIB_GS-12-02-01-1P6-2P0KB |
| North American East Coast | saline water       | JCVI_LIB_GS-13-02-01-1P6-2P0KB |
| North American East Coast | saline water       | JCVI_LIB_GS-14-01-01-1P6-2P0KB |
| Caribbean Sea             | saline water       | JCVI_LIB_GS-15-01-01-1P3-1P6KB |
| Caribbean Sea             | saline water       | JCVI_LIB_GS-16-01-01-1P3-1P6KB |
| Caribbean Sea             | saline water       | JCVI_LIB_GS-17-01-01-1P8-2P2KB |
| Caribbean Sea             | saline water       | JCVI_LIB_GS-18-01-01-1P6-2P0KB |
| Caribbean Sea             | saline water       | JCVI_LIB_GS-19-01-01-1P3-1P6KB |
| Panama Canal              | freshwater habitat | JCVI_LIB_GS-20-01-01-1P3-1P8KB |
| Eastern Tropical Pacific  | saline water       | JCVI_LIB_GS-21-01-01-1P3-1P8KB |
| Eastern Tropical Pacific  | saline water       | JCVI_LIB_GS-22-01-01-1P3-1P6KB |
| Eastern Tropical Pacific  | saline water       | JCVI_LIB_GS-23-01-01-1P8-2P2KB |
| Eastern Tropical Pacific  | saline water       | JCVI_LIB_GS-25-01-01-1P8-2P2KB |
| Galapagos Islands         | saline water       | JCVI_LIB_GS-26-01-01-1P3-1P6KB |
| Galapagos Islands         | saline water       | JCVI_LIB_GS-26-02-01-1P0-1P3KB |
| Galapagos Islands         | saline water       | JCVI_LIB_GS-27-01-01-1P8-2P0KB |
| Galapagos Islands         | saline water       | JCVI_LIB_GS-28-01-01-1P6-2P0KB |
| Galapagos Islands         | saline water       | JCVI_LIB_GS-29-01-01-1P0-1P3KB |
| Galapagos Islands         | saline water       | JCVI_LIB_GS-30-01-01-1P3-1P6KB |
| Galapagos Islands         | saline water       | JCVI_LIB_GS-30-02-01-1P0-1P3KB |
| Galapagos Islands         | saline water       | JCVI_LIB_GS-31-01-01-1P3-1P8KB |
| Galapagos Islands         | saline water       | JCVI_LIB_GS-32-01-01-1P3-1P6KB |
| Galapagos Islands         | saline water       | JCVI_LIB_GS-32-02-01-1P0-1P3KB |
| Galapagos Islands         | saline water       | JCVI_LIB_GS-33-01-01-1P3-1P8KB |
| Galapagos Islands         | saline water       | JCVI_LIB_GS-34-01-01-1P5-1P8KB |
| Galapagos Islands         | saline water       | JCVI_LIB_GS-35-01-01-1P5KB     |
| Galapagos Islands         | saline water       | JCVI_LIB_GS-36-01-01-2P2KB     |
| Eastern Tropical Pacific  | saline water       | JCVI_LIB_GS-37-01-01-1P5KB     |
| Tropical South Pacific    | saline water       | JCVI_LIB_GS-38-01-01-1P5KB     |
| Tropical South Pacific    | saline water       | JCVI_LIB_GS-39-01-01-2P0KB     |
| Tropical South Pacific    | saline water       | JCVI_LIB_GS-40-01-01-1P6-2P0KB |
| Tropical South Pacific    | saline water       | JCVI_LIB_GS-41-01-01-1P6-2P0KB |
| Tropical South Pacific    | saline water       | JCVI_LIB_GS-42-01-01-1P6-2P0KB |
| Tropical South Pacific    | saline water       | JCVI_LIB_GS-43-01-01-1P6-2P0KB |
| Tropical South Pacific    | saline water       | JCVI_LIB_GS-44-01-01-1P6-2P0KB |
| Tropical South Pacific    | saline water       | JCVI_LIB_GS-45-01-01-1P6-2P0KB |
| Tropical South Pacific    | saline water       | JCVI_LIB_GS-46-01-01-1P0-1P3KB |
| Tropical South Pacific    | saline water       | JCVI_LIB_GS-47-01-01-1P6-2P0KB |
| Polynesia Archipelagos    | saline water       | JCVI_LIB_GS-48-01-01-1P6-2P0KB |
| Polynesia Archipelagos    | saline water       | JCVI_LIB_GS-49-01-01-1P6-2P0KB |
| Polynesia Archipelagos    | saline water       | JCVI_LIB_GS-50-01-01-1P3-1P6KB |
| Polynesia Archipelagos    | saline water       | JCVI_LIB_GS-51-01-01-1P6-2P0KB |
| North American East Coast | saline water       | JCVI_LIB_MOVE858-B             |
| North American East Coast | saline water       | JCVI_LIB_MOVE858-A             |
| North American East Coast | saline water       | JCVI_LIB_MOVE858-H             |
| North American East Coast | saline water       | JCVI_LIB_MOVE858-G             |
| North American East Coast | saline water       | JCVI_LIB_MOVE858-F             |
| North American East Coast | saline water       | JCVI_LIB_MOVE858-E             |
| North American East Coast | saline water       | JCVI_LIB_MOVE858-D             |
| North American East Coast | saline water       | JCVI_LIB_MOVE858-C             |
| Polynesia Archipelagos    | saline water       | JCVI_LIB_GSIOSM048-G-01-8-10KB |

|              |              |                               |
|--------------|--------------|-------------------------------|
| Indian Ocean | saline water | JCVI_LIB_GS108-G-02-4-6KB     |
| Indian Ocean | saline water | JCVI_LIB_GSIOSM108-G-01-3-4KB |
| Indian Ocean | saline water | JCVI_LIB_GS109-G-01-3-4KB     |
| Indian Ocean | saline water | JCVI_LIB_GS110-G-02-4-6KB     |
| Indian Ocean | saline water | JCVI_LIB_GSIOSM110-G-01-3-4KB |
| Indian Ocean | saline water | JCVI_LIB_GS111-G-02-4-6KB     |
| Indian Ocean | saline water | JCVI_LIB_GS112-G-02-4-6KB     |
| Indian Ocean | saline water | JCVI_LIB_GSIOSM112-G-01-3-4KB |
| Indian Ocean | saline water | JCVI_LIB_GS113-G-01-4-6KB     |
| Indian Ocean | saline water | JCVI_LIB_GS113-G-02-6-8KB     |
| Indian Ocean | saline water | JCVI_LIB_GS114-G-02-4-6KB     |
| Indian Ocean | saline water | JCVI_LIB_GS114-G-04-1P6-2KB   |
| Indian Ocean | saline water | JCVI_LIB_GS114-G-03-2-3KB     |
| Indian Ocean | saline water | JCVI_LIB_GS115-G-02-4-6KB     |
| Indian Ocean | saline water | JCVI_LIB_GS116-G-02-4-6KB     |
| Indian Ocean | saline water | JCVI_LIB_GS117-G-02-3-5KB     |
| Indian Ocean | saline water | JCVI_LIB_GSIOSM117-G-01-3-4KB |
| Indian Ocean | saline water | JCVI_LIB_GS119-G-01-3-4KB     |
| Indian Ocean | saline water | JCVI_LIB_GS120-G-02-4-6KB     |
| Indian Ocean | saline water | JCVI_LIB_GS121-G-01-4-6KB     |
| Indian Ocean | saline water | JCVI_LIB_GS122-G-02-4-6KB     |
| Indian Ocean | saline water | JCVI_LIB_GS122-G-4-6kb        |
| Indian Ocean | saline water | JCVI_LIB_GSIOSM122-G-01-3-4KB |
| Indian Ocean | saline water | JCVI_LIB_GS123-G-01-4-6KB     |
| Indian Ocean | saline water | JCVI_LIB_GS148-G-01-4-6kb     |
| Indian Ocean | saline water | JCVI_LIB_GS148-G-02-6-8kb     |
| Indian Ocean | saline water | JCVI_LIB_GS149-G-01-4-6kb     |
| Indian Ocean | saline water | JCVI_LIB_GS149-G-02-6-8kb     |

| SEQUENCING_METHOD              | DNA_TYPE | NUM_OF_READS | MATERIAL_ID |
|--------------------------------|----------|--------------|-------------|
| pyrosequencing (454)           | gDNA     | 1382197      | 1401        |
| pyrosequencing (454)           | gDNA     | 1156475      | 1402        |
| dideoxysequencing (Sanger gDNA |          | 237804       | 86          |
| dideoxysequencing (Sanger gDNA |          | 167          | 84          |
| dideoxysequencing (Sanger gDNA |          | 231338       | 84          |
| dideoxysequencing (Sanger gDNA |          | 20768        | 84          |
| dideoxysequencing (Sanger gDNA |          | 154297       | 84          |
| dideoxysequencing (Sanger gDNA |          | 177          | 86          |
| dideoxysequencing (Sanger gDNA |          | 177          | 84          |
| dideoxysequencing (Sanger gDNA |          | 154297       | 86          |
| dideoxysequencing (Sanger gDNA |          | 20768        | 86          |
| dideoxysequencing (Sanger gDNA |          | 231338       | 86          |
| dideoxysequencing (Sanger gDNA |          | 167          | 86          |
| dideoxysequencing (Sanger gDNA |          | 237804       | 84          |
| dideoxysequencing (Sanger gDNA |          | 403          | 84          |
| dideoxysequencing (Sanger gDNA |          | 132277       | 84          |
| dideoxysequencing (Sanger gDNA |          | 29629        | 84          |
| dideoxysequencing (Sanger gDNA |          | 21437        | 84          |
| dideoxysequencing (Sanger gDNA |          | 690          | 84          |
| dideoxysequencing (Sanger gDNA |          | 403          | 86          |
| dideoxysequencing (Sanger gDNA |          | 132744       | 86          |
| dideoxysequencing (Sanger gDNA |          | 132277       | 86          |
| dideoxysequencing (Sanger gDNA |          | 29629        | 86          |
| dideoxysequencing (Sanger gDNA |          | 132744       | 84          |
| dideoxysequencing (Sanger gDNA |          | 690          | 86          |
| dideoxysequencing (Sanger gDNA |          | 21437        | 86          |
| dideoxysequencing (Sanger gDNA |          | 192643       | 85          |
| dideoxysequencing (Sanger gDNA |          | 175607       | 85          |
| dideoxysequencing (Sanger gDNA |          | 585          | 85          |
| dideoxysequencing (Sanger gDNA |          | 3791         | 86          |
| dideoxysequencing (Sanger gDNA |          | 164570       | 86          |
| dideoxysequencing (Sanger gDNA |          | 152071       | 86          |
| dideoxysequencing (Sanger gDNA |          | 8929         | 86          |
| dideoxysequencing (Sanger gDNA |          | 2879         | 86          |
| dideoxysequencing (Sanger gDNA |          | 67381        | 1           |
| dideoxysequencing (Sanger gDNA |          | 74971        | 1           |
| dideoxysequencing (Sanger gDNA |          | 90905        | 1           |
| dideoxysequencing (Sanger gDNA |          | 92351        | 1           |
| dideoxysequencing (Sanger gDNA |          | 121590       | 41          |
| dideoxysequencing (Sanger gDNA |          | 61605        | 42          |
| dideoxysequencing (Sanger gDNA |          | 52959        | 43          |
| dideoxysequencing (Sanger gDNA |          | 61131        | 44          |
| dideoxysequencing (Sanger gDNA |          | 59679        | 45          |
| dideoxysequencing (Sanger gDNA |          | 50980        | 46          |
| dideoxysequencing (Sanger gDNA |          | 129655       | 47          |
| dideoxysequencing (Sanger gDNA |          | 79303        | 48          |
| dideoxysequencing (Sanger gDNA |          | 78304        | 49          |
| dideoxysequencing (Sanger gDNA |          | 124435       | 50          |
| dideoxysequencing (Sanger gDNA |          | 125440       | 51          |

|                                |        |    |
|--------------------------------|--------|----|
| dideoxysequencing (Sanger gDNA | 722    | 51 |
| dideoxysequencing (Sanger gDNA | 138033 | 52 |
| dideoxysequencing (Sanger gDNA | 128885 | 53 |
| dideoxysequencing (Sanger gDNA | 127362 | 54 |
| dideoxysequencing (Sanger gDNA | 127122 | 55 |
| dideoxysequencing (Sanger gDNA | 257581 | 56 |
| dideoxysequencing (Sanger gDNA | 142743 | 57 |
| dideoxysequencing (Sanger gDNA | 135325 | 58 |
| dideoxysequencing (Sanger gDNA | 296355 | 59 |
| dideoxysequencing (Sanger gDNA | 131798 | 60 |
| dideoxysequencing (Sanger gDNA | 121662 | 61 |
| dideoxysequencing (Sanger gDNA | 133051 | 62 |
| dideoxysequencing (Sanger gDNA | 120671 | 63 |
| dideoxysequencing (Sanger gDNA | 101424 | 64 |
| dideoxysequencing (Sanger gDNA | 1284   | 64 |
| dideoxysequencing (Sanger gDNA | 222080 | 65 |
| dideoxysequencing (Sanger gDNA | 189052 | 66 |
| dideoxysequencing (Sanger gDNA | 131529 | 67 |
| dideoxysequencing (Sanger gDNA | 1124   | 68 |
| dideoxysequencing (Sanger gDNA | 358028 | 68 |
| dideoxysequencing (Sanger gDNA | 436401 | 69 |
| dideoxysequencing (Sanger gDNA | 147126 | 70 |
| dideoxysequencing (Sanger gDNA | 892    | 70 |
| dideoxysequencing (Sanger gDNA | 692255 | 71 |
| dideoxysequencing (Sanger gDNA | 134347 | 72 |
| dideoxysequencing (Sanger gDNA | 140814 | 73 |
| dideoxysequencing (Sanger gDNA | 77538  | 74 |
| dideoxysequencing (Sanger gDNA | 65670  | 75 |
| dideoxysequencing (Sanger gDNA | 741    | 87 |
| dideoxysequencing (Sanger gDNA | 759    | 2  |
| dideoxysequencing (Sanger gDNA | 736    | 3  |
| dideoxysequencing (Sanger gDNA | 678    | 4  |
| dideoxysequencing (Sanger gDNA | 699    | 5  |
| dideoxysequencing (Sanger gDNA | 711    | 6  |
| dideoxysequencing (Sanger gDNA | 678    | 76 |
| dideoxysequencing (Sanger gDNA | 730    | 77 |
| dideoxysequencing (Sanger gDNA | 626    | 78 |
| dideoxysequencing (Sanger gDNA | 66023  | 79 |
| dideoxysequencing (Sanger gDNA | 90515  | 80 |
| dideoxysequencing (Sanger gDNA | 92501  | 81 |
| dideoxysequencing (Sanger gDNA | 715    | 82 |
| dideoxysequencing (Sanger gDNA | 128982 | 83 |
| dideoxysequencing (Sanger gDNA | 1457   | 20 |
| dideoxysequencing (Sanger gDNA | 1445   | 20 |
| dideoxysequencing (Sanger gDNA | 1477   | 20 |
| dideoxysequencing (Sanger gDNA | 1492   | 20 |
| dideoxysequencing (Sanger gDNA | 1422   | 20 |
| dideoxysequencing (Sanger gDNA | 1432   | 20 |
| dideoxysequencing (Sanger gDNA | 1437   | 20 |
| dideoxysequencing (Sanger gDNA | 1334   | 20 |
| dideoxysequencing (Sanger gDNA | 47691  | 80 |

|                                |        |     |
|--------------------------------|--------|-----|
| dideoxysequencing (Sanger gDNA | 51787  | 182 |
| dideoxysequencing (Sanger gDNA | 49595  | 182 |
| dideoxysequencing (Sanger gDNA | 59812  | 183 |
| dideoxysequencing (Sanger gDNA | 99288  | 184 |
| dideoxysequencing (Sanger gDNA | 49597  | 184 |
| dideoxysequencing (Sanger gDNA | 59079  | 185 |
| dideoxysequencing (Sanger gDNA | 99781  | 186 |
| dideoxysequencing (Sanger gDNA | 52118  | 186 |
| dideoxysequencing (Sanger gDNA | 108982 | 187 |
| dideoxysequencing (Sanger gDNA | 718    | 187 |
| dideoxysequencing (Sanger gDNA | 329129 | 188 |
| dideoxysequencing (Sanger gDNA | 9953   | 188 |
| dideoxysequencing (Sanger gDNA | 9741   | 188 |
| dideoxysequencing (Sanger gDNA | 61020  | 189 |
| dideoxysequencing (Sanger gDNA | 60932  | 190 |
| dideoxysequencing (Sanger gDNA | 346952 | 191 |
| dideoxysequencing (Sanger gDNA | 50609  | 191 |
| dideoxysequencing (Sanger gDNA | 60987  | 192 |
| dideoxysequencing (Sanger gDNA | 46052  | 193 |
| dideoxysequencing (Sanger gDNA | 110720 | 194 |
| dideoxysequencing (Sanger gDNA | 101558 | 195 |
| dideoxysequencing (Sanger gDNA | 10720  | 195 |
| dideoxysequencing (Sanger gDNA | 50095  | 195 |
| dideoxysequencing (Sanger gDNA | 107966 | 196 |
| dideoxysequencing (Sanger gDNA | 11278  | 197 |
| dideoxysequencing (Sanger gDNA | 96463  | 197 |
| dideoxysequencing (Sanger gDNA | 11713  | 198 |
| dideoxysequencing (Sanger gDNA | 99271  | 198 |



|       |              |       |
|-------|--------------|-------|
| 21    | 13.2 3rd leg | 13.99 |
| 3     | 2.1 3rd leg  | 1.99  |
| 1.7   | 1 3rd leg    | 1.67  |
| 0.2   | 1.7 3rd leg  | 0.18  |
| 0.16  | 2 3rd leg    | 0.1   |
| 0.13  | 2 3rd leg    | 0.08  |
| 0.14  | 1.7 3rd leg  | 0.08  |
| 0.23  | 1.7 3rd leg  | 0.13  |
|       | 2 3rd leg    |       |
| 0.5   | 1.6 4th leg  | 0.51  |
| 0.33  | 2 4th leg    | 0.26  |
| 0.07  | 2 4th leg    | 0.17  |
| 0.11  | 1.1 4th leg  | 0.18  |
| 0.22  | 2 4th leg    | 0.26  |
| 0.22  | 2 4th leg    | 0.26  |
| 0.4   | 2.2 4th leg  | 0.35  |
| 0.35  | 2 4th leg    | 0.33  |
| 0.4   | 2.1 4th leg  | 0.36  |
|       | 19 4th leg   |       |
|       | 19 4th leg   |       |
| 0.35  | 12 4th leg   | 0.36  |
|       | 0.1 4th leg  |       |
|       | 0.1 4th leg  |       |
|       | 0.2 4th leg  |       |
| 0.36  | 2.1 4th leg  | 0.33  |
| 0.28  | 1.7 4th leg  | 0.29  |
| 0.65  | 2.1 4th leg  | 0.4   |
| 0.21  | 1.8 5th leg  | 0.22  |
|       | 1.8 5th leg  |       |
|       | 2 5th leg    |       |
|       | 2.2 5th leg  |       |
|       | 2 5th leg    |       |
|       | 1.7 5th leg  |       |
|       | 1.9 5th leg  |       |
|       | 2 5th leg    |       |
|       | 1.7 5th leg  |       |
|       | 1.9 5th leg  |       |
|       | 30 5th leg   |       |
| 0.071 | 1.4 6th leg  |       |
| 0.071 | 1.4 6th leg  |       |
|       | 1.2 6th leg  |       |
|       | 1 6th leg    |       |
|       | 2.07         |       |
|       | 2.07         |       |
|       | 2.07         |       |
|       | 2.07         |       |
|       | 2.07         |       |
|       | 2.07         |       |
|       | 2.07         |       |
|       | 2.07         |       |
| 0.071 | 1.4 6th leg  |       |

|       |     |
|-------|-----|
| 0.501 | 1.8 |
| 0.501 | 1.8 |
| 0.098 | 1.5 |
| 0.12  | 1.5 |
| 0.12  | 1.5 |
| 0.126 | 1.8 |
| 0.128 | 1.8 |
| 0.128 | 1.8 |
| 0.17  | 1.8 |
| 0.17  | 1.8 |
| 0.009 | 1.5 |
| 0.009 | 1.5 |
| 0.009 | 1.5 |
| 0.144 | 1.5 |
| 0.206 | 1.5 |
| 0.103 | 1.8 |
| 0.103 | 1.8 |
| 0.074 | 2   |
| 0.084 | 2.8 |
| 0.137 | 1.5 |
| 0.15  | 1.9 |
| 0.15  | 1.9 |
| 0.15  | 1.9 |
| 0.142 | 2.2 |
|       | 0.3 |
|       | 0.3 |
|       | 1.5 |
|       | 1.5 |

salinity - (psu water depth - (m temperature - (C chlorophyll density - (ug/ chlorophyll density/annual - (ug

|      |      |      |      |       |
|------|------|------|------|-------|
| 32.4 | 7    | 25.8 |      | 0.501 |
| 32.5 | 4573 | 26.6 |      | 0.128 |
| 36.6 | 4200 | 20   | 0.17 |       |
| 36.7 | 4200 | 20.5 | 0.17 |       |
| 36.7 | 4200 | 20.5 | 0.17 |       |
| 36.7 | 4200 | 20.5 | 0.17 |       |
| 36.7 | 4200 | 20.5 | 0.17 |       |
| 36.6 | 4200 | 20   | 0.17 |       |
| 36.7 | 4200 | 20.5 | 0.17 |       |
| 36.6 | 4200 | 20   | 0.17 |       |
| 36.6 | 4200 | 20   | 0.17 |       |
| 36.6 | 4200 | 20   | 0.17 |       |
| 36.7 | 4200 | 20.5 | 0.17 |       |
| 36.7 | 4200 | 20.5 | 0.17 |       |
| 36.7 | 4200 | 20.5 | 0.17 |       |
| 36.7 | 4200 | 20.5 | 0.17 |       |
| 36.7 | 4200 | 20.5 | 0.17 |       |
| 36.7 | 4200 | 20.5 | 0.17 |       |
| 36.6 | 4200 | 20   | 0.17 |       |
| 36.6 | 4200 | 20   | 0.17 |       |
| 36.6 | 4200 | 20   | 0.17 |       |
| 36.6 | 4200 | 20   | 0.17 |       |
| 36.7 | 4200 | 20.5 | 0.17 |       |
| 36.6 | 4200 | 20   | 0.17 |       |
| 36.6 | 4200 | 20   | 0.17 |       |
| 36.7 | 4200 | 19.8 |      | 0.07  |
| 36.7 | 4200 | 19.8 |      | 0.07  |
| 36.7 | 4200 | 19.8 |      | 0.07  |
| 36.6 | 4200 | 20   | 0.17 |       |
| 36.6 | 4200 | 20   | 0.17 |       |
| 36.6 | 4200 | 20   | 0.17 |       |
| 36.6 | 4200 | 20   | 0.17 |       |
| 36.6 | 4200 | 20   | 0.17 |       |
| 36.7 | 4200 | 22.9 | 0.1  |       |
| 36.7 | 4200 | 22.9 | 0.1  |       |
| 36.7 | 4200 | 22.9 | 0.1  |       |
| 36.7 | 4200 | 22.9 | 0.1  |       |
| 29.2 | 106  | 18.2 |      | 0.93  |
| 29.9 | 119  | 11.7 |      | 0.93  |
| 28.3 | 142  | 17.3 |      | 0.61  |
| 30.2 | 64   | 15   |      | 5.78  |
|      | 11   | 11.2 |      | 1.69  |
| 31.7 | 139  | 17.9 |      | 0.93  |
| 26.5 | 12   | 9.4  |      | 1.42  |
| 31   | 32   | 11   |      | 2.48  |
| 31   | 10   | 12   |      | 2.42  |
|      | 8    | 11   |      | 8.21  |
| 3.5  | 25   | 1    |      | 13.99 |

|      |      |       |       |       |
|------|------|-------|-------|-------|
| 3.5  | 25   | 1     |       | 13.99 |
|      | 20   | 9.3   |       | 1.99  |
|      | 31   | 18.6  |       | 1.67  |
| 36   | 47   | 25    |       | 0.18  |
| 35.8 | 3333 | 26.4  |       | 0.1   |
| 35.8 | 4513 | 27    |       | 0.08  |
| 35.4 | 4470 | 27.4  |       | 0.08  |
| 35.4 | 3336 | 27.7  |       | 0.13  |
| 0.1  | 4.2  | 28.6  |       |       |
| 30.7 | 76   | 27.6  |       | 0.51  |
| 32.3 | 2431 | 29.3  |       | 0.26  |
| 32.6 | 1139 | 28.7  |       | 0.17  |
| 31.4 | 30   | 28.3  |       | 0.18  |
| 32.6 | 2386 | 27.8  |       | 0.26  |
| 32.6 | 2386 | 27.8  |       | 0.26  |
| 34.9 | 2.3  | 25.5  |       | 0.35  |
|      | 156  |       |       | 0.33  |
| 34.5 | 12   | 26.2  |       | 0.36  |
|      | 19   | 26.9  |       |       |
|      | 19   | 26.9  |       |       |
|      | 19.6 | 18.6  |       | 0.36  |
|      | 1.6  | 25.4  |       |       |
|      | 1.6  | 25.4  |       |       |
| 63.4 | 0.3  | 37.6  |       |       |
|      | 35   | 27.5  |       | 0.33  |
| 34.5 | 71   | 21.8  |       | 0.29  |
| 34.6 | 67   | 25.8  |       | 0.4   |
|      | 3334 | 28    |       | 0.22  |
|      | 4000 | 28.4  |       |       |
|      | 4000 | 28.6  |       |       |
|      | 4000 | 27.8  |       |       |
| 35   | 4000 | 28    |       |       |
|      | 4000 | 27.6  |       |       |
| 35.9 | 4000 | 27.6  |       |       |
|      | 4000 | 27.6  |       |       |
| 37   | 4000 | 28.3  |       |       |
| 35.3 | 4000 | 28.7  |       |       |
| 37.3 | 2400 | 28.6  |       |       |
| 35.1 | 34   | 28.9  | 0.095 |       |
| 32.6 | 900  | 28.8  | 0.095 |       |
|      | 24   | 27.8  |       |       |
| 34.2 | 10   | 27.3  |       |       |
| 6.56 |      | 15.02 |       |       |
| 6.56 |      | 15.02 |       |       |
| 6.56 |      | 15.02 |       |       |
| 6.56 |      | 15.02 |       |       |
| 6.56 |      | 15.02 |       |       |
| 6.56 |      | 15.02 |       |       |
| 6.56 |      | 15.02 |       |       |
| 6.56 |      | 15.02 |       |       |
| 35.1 | 34   | 28.9  | 0.095 |       |

|      |      |      |       |
|------|------|------|-------|
| 32.4 | 7    | 25.8 | 0.108 |
| 32.4 | 7    | 25.8 | 0.108 |
| 32.6 | 4573 | 27.2 | 0.138 |
| 32.7 | 1220 | 27   | 0.128 |
| 32.7 | 1220 | 27   | 0.128 |
| 32.3 | 3841 | 26.4 | 0.203 |
| 32.5 | 4573 | 26.6 | 0.134 |
| 32.5 | 4573 | 26.6 | 0.134 |
| 33.3 | 4573 | 27.5 | 0.24  |
| 33.3 | 4573 | 27.5 | 0.24  |
| 33.1 | 3649 | 28.2 | 0.14  |
| 33.1 | 3649 | 28.2 | 0.14  |
| 33.1 | 3649 | 28.2 | 0.14  |
| 33.2 | 3220 | 27.9 | 0.142 |
| 33.1 | 2150 | 26.2 | 0.287 |
| 35.5 | 14   | 26.4 | 0.206 |
| 35.5 | 14   | 26.4 | 0.206 |
| 35.4 | 2995 | 23.8 | 0.078 |
| 35.6 | 5081 | 22.5 | 0.117 |
| 35.4 | 4309 | 23.1 | 0.14  |
| 35.8 | 4921 | 20.2 | 0.151 |
| 35.8 | 4921 | 20.2 | 0.151 |
| 35.8 | 4921 | 20.2 | 0.151 |
| 35.8 | 1860 | 20.4 | 0.228 |
|      | 1    |      |       |
|      | 1    |      |       |
|      | 5    |      |       |
|      | 5    |      |       |

dissolved oxygen - (nmol/l) fluorescence - (ug/l) transmission



**Table S5 - Published Gut Viromes that were Analyzed**

| <b>SRA run number</b> | <b>Reference</b>                                         |
|-----------------------|----------------------------------------------------------|
| SRR029698             | Reyes et al., 2010. Nature                               |
| SRR029697             | Reyes et al., 2010. Nature                               |
| SRR029695             | Reyes et al., 2010. Nature                               |
| SRR029693             | Reyes et al., 2010. Nature                               |
| SRR029691             | Reyes et al., 2010. Nature                               |
| SRR029690             | Reyes et al., 2010. Nature                               |
| SRR029689             | Reyes et al., 2010. Nature                               |
| SRR029688             | Reyes et al., 2010. Nature                               |
| SRR029686             | Reyes et al., 2010. Nature                               |
| SRR029703             | Reyes et al., 2010. Nature                               |
| SRR029702             | Reyes et al., 2010. Nature                               |
| SRR029701             | Reyes et al., 2010. Nature                               |
| SRR029700             | Reyes et al., 2010. Nature                               |
| SRR029699             | Reyes et al., 2010. Nature                               |
| SRR029696             | Reyes et al., 2010. Nature                               |
| SRR029694             | Reyes et al., 2010. Nature                               |
| SRR029692             | Reyes et al., 2010. Nature                               |
| SRR043420             | Minot et al., 2011, Genome Research                      |
| SRR043421             | Minot et al., 2011, Genome Research                      |
| SRR043422             | Minot et al., 2011, Genome Research                      |
| SRR043423             | Minot et al., 2011, Genome Research                      |
| SRR043424             | Minot et al., 2011, Genome Research                      |
| SRR043425             | Minot et al., 2011, Genome Research                      |
| SRR043426             | Minot et al., 2011, Genome Research                      |
| SRR043427             | Minot et al., 2011, Genome Research                      |
| SRR043428             | Minot et al., 2011, Genome Research                      |
| SRR043429             | Minot et al., 2011, Genome Research                      |
| SRR043430             | Minot et al., 2011, Genome Research                      |
| SRR043431             | Minot et al., 2011, Genome Research                      |
| SRR043432             | Minot et al., 2011, Genome Research                      |
| SRR043433             | Minot et al., 2011, Genome Research                      |
| SRR043434             | Minot et al., 2011, Genome Research                      |
| SRR043435             | Minot et al., 2011, Genome Research                      |
| SRR043436             | Minot et al., 2011, Genome Research                      |
| SRR089800             | Kim et al., 2011, Applied and Environmental Microbiology |
| SRR089802             | Kim et al., 2011, Applied and Environmental Microbiology |
| SRR089803             | Kim et al., 2011, Applied and Environmental Microbiology |
| SRR089804             | Kim et al., 2011, Applied and Environmental Microbiology |
| SRR089805             | Kim et al., 2011, Applied and Environmental Microbiology |
